# Supplementary material for: PI4K-beta and MKNK1 are regulators of hepatitis C virus IRES-dependent translation
Source: PubMed Central journal article supplement (PMC4555030; doi:10.1038/srep13344), 2015-09-01
Supplement: srep13344-s1.pdf [file srep13344-s1.pdf]

## PI4K-beta and MKNK1 are regulators of hepatitis C virus IRES translation

Joachim Lupberger<sup>1,2</sup>, Claudia Casanova<sup>3</sup>, Benoit Fischer<sup>4</sup>, Amelie Weiss<sup>4</sup>, Isabel Fofana<sup>1,2</sup>,  
Nelly Fontaine<sup>1,2</sup>, Toshinobu Fujiwara<sup>5</sup>, Mickael Renaud<sup>4</sup>, Arnaud Kopp<sup>4</sup>, Catherine Schuster<sup>1,2</sup>,  
Laurent Brino<sup>4</sup>, Thomas F. Baumert<sup>1,2,6</sup> and Christian Thoma<sup>3</sup>.

### Supplementary Information

**Supplementary table S1: High-throughput screening results of the primary screen.** Impact of target-specific siRNA silencing on IRES versus cap-dependent translation in Huh7.5 cells is compared as normalized ratios of relative light units of *firefly* (IRES) / *renilla* (cap) luciferase activities. (Mean  $\pm$  sd from one experiment with three independent replicates on parallel plates). Screening results are scored by Z-values. Hits (Z-score  $<-1.28$ ) are highlighted in bold and green. (§) Gene re-screened in a second experiment (technical failure of one plate in the first screen).

| GeneID          | norm_exp1 | norm_exp2 | norm_exp3 | m     | sd    | Z-score      |
|-----------------|-----------|-----------|-----------|-------|-------|--------------|
| <b>CSNK2B</b>   | 0.718     | 0.572     | 0.610     | 0.633 | 0.076 | <b>-2.80</b> |
| <b>ADK</b>      | 0.670     | 0.758     | 0.583     | 0.670 | 0.088 | <b>-2.51</b> |
| <b>LTK</b>      | 0.614     | 0.720     | 0.775     | 0.703 | 0.082 | <b>-2.28</b> |
| <b>ITPKA</b>    | 0.754     | 0.567     | 0.849     | 0.723 | 0.143 | <b>-2.14</b> |
| <b>GK2</b>      | 0.641     | 0.814     | 0.716     | 0.724 | 0.087 | <b>-2.11</b> |
| <b>PTPRN</b>    | 0.713     | 0.722     | 0.737     | 0.724 | 0.012 | <b>-2.11</b> |
| <b>PIM1</b>     | 0.806     | 0.583     | 0.881     | 0.757 | 0.155 | <b>-1.88</b> |
| <b>MGC75495</b> | 0.708     | 0.762     | 0.798     | 0.756 | 0.045 | <b>-1.87</b> |
| <b>PCK3</b>     | 0.716     | 0.765     | 0.790     | 0.757 | 0.038 | <b>-1.86</b> |
| <b>PIK4CB</b>   | 0.701     | 0.734     | 0.840     | 0.758 | 0.073 | <b>-1.86</b> |
| <b>CDK7</b>     | 0.801     | 0.800     | 0.698     | 0.766 | 0.059 | <b>-1.77</b> |
| <b>PTPN12</b>   | 0.897     | 0.721     | 0.687     | 0.768 | 0.113 | <b>-1.76</b> |
| <b>PTPN2</b>    | 0.813     | 0.814     | 0.682     | 0.770 | 0.076 | <b>-1.75</b> |

|                 |       |       |       |       |       |       |
|-----------------|-------|-------|-------|-------|-------|-------|
| <b>PK4</b>      | 0.652 | 0.884 | 0.783 | 0.773 | 0.116 | -1.74 |
| <b>MKNK1</b>    | 0.693 | 0.837 | 0.794 | 0.775 | 0.074 | -1.73 |
| <b>DGKZ</b>     | 0.721 | 0.849 | 0.755 | 0.775 | 0.066 | -1.72 |
| <b>MINPP1</b>   | 0.713 | 0.876 | 0.742 | 0.777 | 0.087 | -1.70 |
| <b>CDK8</b>     | 0.926 | 0.782 | 0.619 | 0.776 | 0.154 | -1.69 |
| <b>GRK4</b>     | 0.782 | 0.793 | 0.766 | 0.780 | 0.014 | -1.68 |
| <b>NTRK1</b>    | 0.777 | 0.775 | 0.799 | 0.784 | 0.013 | -1.66 |
| <b>MAP3K4</b>   | 0.796 | 0.867 | 0.686 | 0.783 | 0.091 | -1.64 |
| <b>MAP3K12</b>  | 0.804 | 0.797 | 0.761 | 0.787 | 0.023 | -1.62 |
| <b>MST1R</b>    | 0.755 | 0.752 | 0.867 | 0.791 | 0.066 | -1.61 |
| <b>ROR1</b>     | 0.819 | 0.784 | 0.769 | 0.791 | 0.026 | -1.60 |
| <b>ALPI</b>     | 0.930 | 0.804 | 0.631 | 0.788 | 0.150 | -1.59 |
| <b>CSK</b>      | 0.759 | 0.869 | 0.742 | 0.790 | 0.069 | -1.59 |
| <b>KHK</b>      | 0.768 | 0.828 | 0.787 | 0.794 | 0.031 | -1.57 |
| <b>CDC42BPA</b> | 0.765 | 0.750 | 0.877 | 0.797 | 0.069 | -1.56 |
| <b>PTPRS</b>    | 0.763 | 0.775 | 0.852 | 0.797 | 0.048 | -1.56 |
| <b>CDK4</b>     | 0.752 | 0.889 | 0.763 | 0.801 | 0.076 | -1.51 |
| <b>CIB3</b>     | 0.943 | 0.728 | 0.730 | 0.800 | 0.124 | -1.51 |
| <b>PFKFB4</b>   | 0.803 | 0.844 | 0.757 | 0.801 | 0.044 | -1.51 |
| <b>ULK1</b>     | 0.780 | 0.848 | 0.788 | 0.805 | 0.037 | -1.49 |
| <b>CDKN2B</b>   | 0.915 | 0.794 | 0.727 | 0.812 | 0.095 | -1.42 |
| <b>PFKM (§)</b> | 0.750 | 0.677 | 0.750 | 0.726 | 0.042 | -1.41 |
| <b>GALK2</b>    | 0.736 | 0.951 | 0.760 | 0.816 | 0.118 | -1.40 |
| <b>STK25</b>    | 0.831 | 0.802 | 0.817 | 0.817 | 0.015 | -1.40 |
| <b>TYROBP</b>   | 0.760 | 0.802 | 0.903 | 0.822 | 0.074 | -1.38 |
| <b>PPP1R12C</b> | 0.790 | 0.783 | 0.897 | 0.823 | 0.064 | -1.36 |
| <b>NYD-SP25</b> | 0.686 | 0.760 | 1.044 | 0.830 | 0.189 | -1.33 |
| <b>PRKAA2</b>   | 0.867 | 0.849 | 0.758 | 0.825 | 0.058 | -1.33 |
| <b>MTMR12</b>   | 0.898 | 0.910 | 0.665 | 0.824 | 0.138 | -1.32 |
| <b>PTPLA</b>    | 0.976 | 0.769 | 0.732 | 0.826 | 0.132 | -1.32 |
| <b>CKMT2</b>    | 1.034 | 0.667 | 0.784 | 0.828 | 0.187 | -1.31 |
| <b>EPHA5</b>    | 0.824 | 0.814 | 0.858 | 0.832 | 0.023 | -1.29 |
| <b>PPP2R4</b>   | 0.846 | 0.770 | 0.885 | 0.834 | 0.058 | -1.28 |
| <b>IMPA1</b>    | 0.820 | 0.968 | 0.708 | 0.832 | 0.130 | -1.26 |
| <b>PPP1CA</b>   | 0.902 | 0.843 | 0.761 | 0.835 | 0.071 | -1.25 |
| <b>PPM1G</b>    | 0.805 | 0.933 | 0.769 | 0.836 | 0.086 | -1.24 |
| <b>PRKAA1</b>   | 0.814 | 0.734 | 0.982 | 0.843 | 0.127 | -1.22 |
| <b>PKN1 (§)</b> | 0.849 | 0.821 | 0.650 | 0.773 | 0.108 | -1.22 |
| <b>EPHA7</b>    | 0.906 | 0.896 | 0.716 | 0.839 | 0.107 | -1.21 |
| <b>IHPK3</b>    | 0.914 | 0.768 | 0.843 | 0.842 | 0.073 | -1.21 |
| <b>LIMK2</b>    | 0.894 | 0.762 | 0.871 | 0.842 | 0.071 | -1.21 |
| <b>WNK2</b>     | 0.817 | 0.826 | 0.884 | 0.842 | 0.036 | -1.21 |

|          |       |       |       |       |       |       |
|----------|-------|-------|-------|-------|-------|-------|
| CDKN2D   | 0.881 | 0.721 | 0.935 | 0.846 | 0.111 | -1.20 |
| MTMR6    | 0.864 | 0.822 | 0.845 | 0.844 | 0.021 | -1.19 |
| PDK3     | 0.877 | 0.790 | 0.867 | 0.845 | 0.048 | -1.19 |
| PTK7 (S) | 0.740 | 0.744 | 0.850 | 0.778 | 0.062 | -1.19 |
| PRKCD    | 0.773 | 0.844 | 0.925 | 0.847 | 0.076 | -1.18 |
| ADCK4    | 0.769 | 0.785 | 0.996 | 0.850 | 0.127 | -1.17 |
| MKNK2    | 0.875 | 0.884 | 0.775 | 0.845 | 0.061 | -1.17 |
| IKKB     | 0.900 | 0.829 | 0.812 | 0.847 | 0.047 | -1.16 |
| PRKY     | 0.873 | 0.828 | 0.842 | 0.848 | 0.023 | -1.16 |
| PTPN14   | 0.808 | 0.828 | 0.913 | 0.850 | 0.056 | -1.16 |
| PFKFB2   | 0.803 | 0.879 | 0.870 | 0.851 | 0.042 | -1.15 |
| PTPN22   | 0.864 | 0.846 | 0.838 | 0.849 | 0.013 | -1.15 |
| SNAP23   | 0.914 | 0.864 | 0.770 | 0.849 | 0.073 | -1.14 |
| PHKB     | 0.809 | 0.873 | 0.876 | 0.853 | 0.038 | -1.13 |
| CALM2    | 0.905 | 0.915 | 0.735 | 0.852 | 0.101 | -1.11 |
| CSNK1G1  | 0.854 | 0.840 | 0.870 | 0.855 | 0.015 | -1.11 |
| PPP2R5C  | 0.820 | 0.845 | 0.903 | 0.856 | 0.043 | -1.11 |
| PRKAG3   | 0.826 | 0.984 | 0.747 | 0.852 | 0.121 | -1.11 |
| PTPRG    | 0.897 | 0.793 | 0.880 | 0.857 | 0.056 | -1.10 |
| PIK3C2A  | 0.955 | 0.665 | 0.958 | 0.859 | 0.168 | -1.09 |
| ROR2     | 0.845 | 0.897 | 0.832 | 0.858 | 0.034 | -1.08 |
| AKT1     | 0.795 | 0.842 | 0.957 | 0.865 | 0.083 | -1.05 |
| PTPN13   | 0.860 | 0.838 | 0.896 | 0.865 | 0.029 | -1.04 |
| FGFR1    | 0.810 | 0.876 | 0.915 | 0.867 | 0.053 | -1.03 |
| AKAP13   | 0.966 | 0.808 | 0.823 | 0.866 | 0.087 | -1.02 |
| PLAU     | 0.981 | 0.715 | 0.909 | 0.868 | 0.138 | -1.02 |
| RIOK2    | 0.895 | 0.766 | 0.942 | 0.868 | 0.091 | -1.02 |
| JAK1     | 0.863 | 0.878 | 0.863 | 0.868 | 0.009 | -1.01 |
| PANK2    | 0.834 | 0.884 | 0.884 | 0.867 | 0.029 | -1.01 |
| NEK3     | 0.787 | 0.878 | 0.958 | 0.874 | 0.086 | -0.97 |
| PPP1R14D | 0.922 | 0.916 | 0.784 | 0.874 | 0.078 | -0.95 |
| SPHK2    | 1.000 | 0.818 | 0.805 | 0.874 | 0.109 | -0.95 |
| DUSP6    | 0.832 | 0.873 | 0.930 | 0.878 | 0.049 | -0.94 |
| PPP3R1   | 0.846 | 0.904 | 0.882 | 0.877 | 0.029 | -0.94 |
| SGPP1    | 0.888 | 0.924 | 0.816 | 0.876 | 0.055 | -0.94 |
| NRBP     | 0.872 | 0.834 | 0.938 | 0.881 | 0.053 | -0.92 |
| PPP1R3C  | 0.805 | 0.904 | 0.933 | 0.881 | 0.067 | -0.92 |
| PPP2R1A  | 0.927 | 0.840 | 0.872 | 0.880 | 0.044 | -0.92 |
| GRK6     | 0.918 | 0.860 | 0.863 | 0.880 | 0.033 | -0.91 |
| MAP3K11  | 0.787 | 0.865 | 1.000 | 0.884 | 0.108 | -0.91 |
| MGC4796  | 0.895 | 0.816 | 0.935 | 0.882 | 0.061 | -0.91 |
| PTPN3    | 0.888 | 0.946 | 0.806 | 0.880 | 0.070 | -0.91 |

|             |       |       |       |       |       |       |
|-------------|-------|-------|-------|-------|-------|-------|
| PDK1 (§)    | 1.028 | 0.710 | 0.688 | 0.809 | 0.190 | -0.91 |
| FN3KRP      | 0.839 | 0.830 | 0.986 | 0.885 | 0.088 | -0.90 |
| PDIK1L      | 0.911 | 0.857 | 0.877 | 0.882 | 0.027 | -0.90 |
| PTPN20B     | 0.847 | 0.882 | 0.921 | 0.883 | 0.037 | -0.90 |
| STK36       | 0.833 | 0.895 | 0.922 | 0.883 | 0.046 | -0.90 |
| EIF2AK2 (§) | 0.877 | 0.872 | 0.750 | 0.833 | 0.072 | -0.90 |
| CDK9        | 0.869 | 1.000 | 0.777 | 0.882 | 0.112 | -0.89 |
| DGKI        | 0.851 | 0.947 | 0.851 | 0.883 | 0.055 | -0.89 |
| PTPRR       | 0.841 | 0.929 | 0.880 | 0.883 | 0.044 | -0.89 |
| CAMK2G      | 0.881 | 0.921 | 0.849 | 0.884 | 0.036 | -0.88 |
| OXSRI       | 0.921 | 0.820 | 0.913 | 0.885 | 0.056 | -0.88 |
| CDKN1C      | 0.891 | 0.902 | 0.866 | 0.886 | 0.018 | -0.87 |
| JAK3        | 0.838 | 0.972 | 0.844 | 0.885 | 0.076 | -0.87 |
| AK2         | 0.847 | 0.935 | 0.887 | 0.890 | 0.044 | -0.85 |
| CKMT1       | 0.994 | 0.964 | 0.698 | 0.885 | 0.163 | -0.85 |
| STK24       | 0.944 | 0.872 | 0.852 | 0.889 | 0.048 | -0.84 |
| PRKACA (§)  | 0.685 | 0.872 | 0.975 | 0.844 | 0.147 | -0.84 |
| DOK1        | 1.000 | 0.848 | 0.823 | 0.890 | 0.096 | -0.83 |
| PRKAG1      | 0.885 | 0.854 | 0.940 | 0.893 | 0.044 | -0.83 |
| NYD-SP25    | 0.902 | 0.844 | 0.935 | 0.894 | 0.046 | -0.82 |
| SNARK       | 0.828 | 0.884 | 0.972 | 0.895 | 0.073 | -0.82 |
| CDK10       | 0.873 | 0.806 | 1.010 | 0.896 | 0.104 | -0.81 |
| CSNK2A2     | 0.949 | 0.727 | 1.014 | 0.897 | 0.150 | -0.81 |
| ILK         | 0.802 | 0.945 | 0.937 | 0.895 | 0.080 | -0.81 |
| LOC55971    | 0.799 | 0.909 | 0.980 | 0.896 | 0.091 | -0.81 |
| PAK1        | 0.822 | 0.988 | 0.870 | 0.893 | 0.085 | -0.81 |
| DGKD        | 0.916 | 0.843 | 0.929 | 0.896 | 0.046 | -0.80 |
| FUK         | 0.857 | 0.975 | 0.851 | 0.894 | 0.070 | -0.80 |
| MAP4K5      | 0.902 | 0.860 | 0.927 | 0.896 | 0.034 | -0.80 |
| PIK4CA      | 0.898 | 0.867 | 0.923 | 0.896 | 0.028 | -0.80 |
| NRGN (§)    | 0.833 | 1.032 | 0.719 | 0.861 | 0.158 | -0.80 |
| FLT4        | 0.923 | 0.848 | 0.922 | 0.898 | 0.043 | -0.79 |
| CIB2        | 0.933 | 0.892 | 0.868 | 0.898 | 0.033 | -0.78 |
| MAPK14      | 1.000 | 0.776 | 0.921 | 0.899 | 0.114 | -0.78 |
| PIK3CA      | 0.924 | 0.855 | 0.917 | 0.899 | 0.038 | -0.78 |
| PIP5K2A     | 0.879 | 0.855 | 0.964 | 0.899 | 0.057 | -0.78 |
| PPFIA2      | 0.910 | 0.910 | 0.871 | 0.897 | 0.023 | -0.78 |
| LRRK2 (§)   | 0.722 | 0.968 | 0.906 | 0.865 | 0.128 | -0.78 |
| CRK7        | 0.976 | 0.951 | 0.764 | 0.897 | 0.116 | -0.77 |
| KIT         | 0.648 | 1.048 | 1.007 | 0.901 | 0.220 | -0.77 |
| PI4K2B      | 0.799 | 0.893 | 1.012 | 0.901 | 0.107 | -0.77 |
| PPP1R12B    | 0.891 | 0.892 | 0.918 | 0.900 | 0.015 | -0.76 |

|                |       |       |       |       |       |       |
|----------------|-------|-------|-------|-------|-------|-------|
| STK22C         | 0.870 | 0.967 | 0.861 | 0.899 | 0.059 | -0.76 |
| ZC3HC1         | 0.839 | 0.914 | 0.952 | 0.902 | 0.058 | -0.76 |
| ACPP           | 0.922 | 0.997 | 0.785 | 0.901 | 0.108 | -0.74 |
| CASK           | 0.911 | 1.000 | 0.794 | 0.902 | 0.103 | -0.74 |
| PKIB           | 0.885 | 0.896 | 0.935 | 0.905 | 0.026 | -0.73 |
| PRKAR1A        | 0.820 | 0.896 | 1.003 | 0.906 | 0.092 | -0.73 |
| DGKH (\$)      | 0.722 | 0.839 | 1.031 | 0.864 | 0.156 | -0.73 |
| AKAP8          | 0.893 | 0.886 | 0.939 | 0.906 | 0.029 | -0.72 |
| CSNK1G2        | 0.926 | 0.952 | 0.835 | 0.904 | 0.061 | -0.72 |
| FYN            | 1.003 | 0.695 | 1.026 | 0.908 | 0.185 | -0.72 |
| SORCS3         | 0.955 | 0.802 | 0.965 | 0.907 | 0.091 | -0.72 |
| LOC283155 (\$) | 0.889 | 0.806 | 0.875 | 0.857 | 0.044 | -0.72 |
| NEK7 (\$)      | 0.778 | 0.968 | 0.875 | 0.874 | 0.095 | -0.72 |
| HK2            | 1.210 | 0.634 | 0.878 | 0.907 | 0.289 | -0.71 |
| PRKD2          | 0.909 | 0.847 | 0.969 | 0.908 | 0.061 | -0.71 |
| MAP2K5         | 0.909 | 0.906 | 0.909 | 0.908 | 0.002 | -0.70 |
| PTPN4          | 0.942 | 0.880 | 0.908 | 0.910 | 0.031 | -0.69 |
| PPM1L          | 0.912 | 0.898 | 0.926 | 0.912 | 0.014 | -0.68 |
| TIE1           | 0.961 | 0.930 | 0.839 | 0.910 | 0.063 | -0.68 |
| PKIA (\$)      | 0.904 | 0.846 | 0.875 | 0.875 | 0.029 | -0.67 |
| CDC42BPB       | 0.966 | 0.854 | 0.921 | 0.914 | 0.056 | -0.66 |
| CHUK           | 0.847 | 0.908 | 0.990 | 0.915 | 0.072 | -0.66 |
| PIK3CG         | 1.013 | 0.871 | 0.860 | 0.915 | 0.085 | -0.64 |
| RPS6KA5        | 0.848 | 0.874 | 1.035 | 0.919 | 0.101 | -0.64 |
| PPP2R5A        | 0.795 | 1.050 | 0.908 | 0.918 | 0.128 | -0.63 |
| ROCK1 (\$)     | 0.877 | 0.821 | 0.950 | 0.883 | 0.065 | -0.63 |
| CDK3           | 0.803 | 0.974 | 0.983 | 0.920 | 0.101 | -0.62 |
| MAPK11         | 0.850 | 1.042 | 0.862 | 0.918 | 0.108 | -0.62 |
| SLK            | 0.994 | 0.958 | 0.797 | 0.916 | 0.105 | -0.62 |
| ITPKC          | 0.965 | 0.972 | 0.819 | 0.919 | 0.086 | -0.61 |
| PAK3           | 0.911 | 0.931 | 0.917 | 0.920 | 0.010 | -0.61 |
| PTPRH          | 0.919 | 0.870 | 0.976 | 0.922 | 0.053 | -0.61 |
| MINK1          | 0.965 | 0.883 | 0.922 | 0.923 | 0.041 | -0.59 |
| PHPT1          | 0.898 | 0.970 | 0.897 | 0.922 | 0.042 | -0.59 |
| PRKG1          | 0.944 | 0.911 | 0.914 | 0.923 | 0.018 | -0.59 |
| NME5           | 0.883 | 0.872 | 1.026 | 0.927 | 0.086 | -0.58 |
| PPP1CB         | 0.907 | 0.931 | 0.935 | 0.924 | 0.015 | -0.58 |
| CKB            | 0.926 | 0.976 | 0.871 | 0.924 | 0.053 | -0.57 |
| PTPRD          | 0.976 | 0.763 | 1.046 | 0.928 | 0.147 | -0.57 |
| PTPRE          | 0.858 | 0.870 | 1.058 | 0.929 | 0.112 | -0.57 |
| GUK1 (\$)      | 0.917 | 0.871 | 0.875 | 0.888 | 0.025 | -0.57 |
| STK11          | 0.916 | 0.854 | 1.015 | 0.928 | 0.081 | -0.56 |

|               |       |       |       |       |       |       |
|---------------|-------|-------|-------|-------|-------|-------|
| VRK3          | 0.927 | 0.912 | 0.944 | 0.928 | 0.016 | -0.56 |
| CaMKIINalpha  | 0.811 | 0.884 | 1.100 | 0.932 | 0.150 | -0.55 |
| ILKAP         | 0.918 | 0.987 | 0.874 | 0.926 | 0.057 | -0.55 |
| NTRK3         | 0.884 | 1.041 | 0.853 | 0.926 | 0.101 | -0.55 |
| BRAF          | 0.905 | 0.928 | 0.955 | 0.929 | 0.025 | -0.54 |
| PTPRM         | 0.898 | 1.030 | 0.856 | 0.928 | 0.091 | -0.54 |
| WEE1          | 0.848 | 0.973 | 0.970 | 0.930 | 0.071 | -0.54 |
| AAK1          | 0.960 | 0.971 | 0.857 | 0.929 | 0.063 | -0.53 |
| FRK           | 0.937 | 1.014 | 0.837 | 0.929 | 0.089 | -0.53 |
| CIT           | 0.955 | 0.970 | 0.868 | 0.931 | 0.055 | -0.52 |
| IKBKE         | 0.961 | 0.940 | 0.894 | 0.932 | 0.034 | -0.52 |
| STK16         | 0.933 | 1.012 | 0.845 | 0.930 | 0.084 | -0.52 |
| AK1           | 0.956 | 0.935 | 0.907 | 0.933 | 0.025 | -0.51 |
| CDC2          | 0.898 | 0.945 | 0.957 | 0.933 | 0.031 | -0.51 |
| DAPK1         | 0.954 | 1.006 | 0.834 | 0.931 | 0.088 | -0.51 |
| LOC392265     | 0.995 | 0.866 | 0.941 | 0.934 | 0.065 | -0.51 |
| MAGI1         | 1.065 | 0.815 | 0.920 | 0.933 | 0.126 | -0.51 |
| CAMKK1        | 0.870 | 0.884 | 1.060 | 0.938 | 0.106 | -0.49 |
| EIF2AK4       | 0.953 | 0.990 | 0.861 | 0.935 | 0.066 | -0.49 |
| PPP1R11       | 0.958 | 0.997 | 0.845 | 0.933 | 0.079 | -0.49 |
| PPP1R1A       | 0.977 | 0.926 | 0.901 | 0.935 | 0.039 | -0.49 |
| LOC390975 (§) | 1.083 | 0.806 | 0.781 | 0.890 | 0.168 | -0.49 |
| AKIP          | 0.972 | 0.952 | 0.886 | 0.937 | 0.045 | -0.48 |
| CDK2          | 0.839 | 0.935 | 1.045 | 0.940 | 0.103 | -0.48 |
| CTDSPL        | 0.981 | 0.941 | 0.887 | 0.936 | 0.047 | -0.48 |
| FCRL2         | 0.912 | 0.872 | 1.034 | 0.939 | 0.084 | -0.48 |
| PDK2          | 0.949 | 0.977 | 0.882 | 0.936 | 0.049 | -0.48 |
| PHKG2         | 0.923 | 0.959 | 0.930 | 0.937 | 0.019 | -0.48 |
| PIP5K2C       | 0.882 | 0.959 | 0.972 | 0.938 | 0.049 | -0.48 |
| SIRPA         | 0.900 | 0.975 | 0.939 | 0.938 | 0.038 | -0.48 |
| PRKCA (§)     | 0.959 | 0.974 | 0.800 | 0.911 | 0.096 | -0.48 |
| FLJ14800      | 0.909 | 0.936 | 0.971 | 0.939 | 0.031 | -0.47 |
| FLT3          | 1.049 | 0.924 | 0.837 | 0.937 | 0.107 | -0.47 |
| NME2          | 0.929 | 0.909 | 0.979 | 0.939 | 0.036 | -0.47 |
| PIP5K1B       | 0.898 | 0.997 | 0.919 | 0.938 | 0.052 | -0.47 |
| MAPK3 (§)     | 0.767 | 0.974 | 1.000 | 0.914 | 0.128 | -0.47 |
| PFKL          | 0.975 | 0.931 | 0.911 | 0.939 | 0.033 | -0.46 |
| PHOSPHO1      | 0.888 | 0.987 | 0.945 | 0.940 | 0.050 | -0.46 |
| PRKCG         | 0.938 | 0.839 | 1.049 | 0.942 | 0.105 | -0.46 |
| PTPRZ1        | 0.919 | 0.876 | 1.031 | 0.942 | 0.080 | -0.46 |
| PTK6 (§)      | 1.041 | 0.897 | 0.800 | 0.913 | 0.121 | -0.46 |
| SKP1 (§)      | 1.041 | 0.846 | 0.850 | 0.912 | 0.111 | -0.46 |

|                |       |       |       |       |       |       |
|----------------|-------|-------|-------|-------|-------|-------|
| STK35 (\$)     | 0.861 | 1.032 | 0.875 | 0.923 | 0.095 | -0.46 |
| LOC400927      | 1.039 | 0.992 | 0.783 | 0.938 | 0.136 | -0.45 |
| PTPN21         | 0.970 | 0.983 | 0.866 | 0.940 | 0.064 | -0.45 |
| LOC285940 (\$) | 0.972 | 0.839 | 0.906 | 0.906 | 0.067 | -0.45 |
| SRPK2 (\$)     | 1.123 | 0.872 | 0.750 | 0.915 | 0.190 | -0.45 |
| ARAF           | 1.015 | 1.000 | 0.804 | 0.940 | 0.118 | -0.44 |
| C21orf124      | 0.751 | 1.074 | 1.004 | 0.943 | 0.170 | -0.44 |
| GRK7           | 0.932 | 0.880 | 1.022 | 0.945 | 0.072 | -0.44 |
| MELK           | 0.994 | 0.901 | 0.933 | 0.943 | 0.047 | -0.44 |
| NEK9           | 0.853 | 0.936 | 1.043 | 0.944 | 0.095 | -0.44 |
| STK6           | 0.947 | 0.997 | 0.879 | 0.941 | 0.059 | -0.44 |
| PRKACG (\$)    | 0.658 | 0.974 | 1.125 | 0.919 | 0.238 | -0.44 |
| GK             | 0.979 | 0.903 | 0.950 | 0.944 | 0.038 | -0.43 |
| PPP1R9A        | 0.936 | 1.006 | 0.887 | 0.943 | 0.060 | -0.43 |
| YES1           | 0.978 | 0.955 | 0.894 | 0.942 | 0.043 | -0.43 |
| HIPK4 (\$)     | 0.917 | 0.613 | 1.156 | 0.895 | 0.272 | -0.43 |
| MAPK10 (\$)    | 0.959 | 0.846 | 0.950 | 0.918 | 0.063 | -0.43 |
| LOC400301      | 0.878 | 0.986 | 0.972 | 0.945 | 0.059 | -0.42 |
| PPP1R12A       | 0.957 | 0.933 | 0.944 | 0.945 | 0.012 | -0.42 |
| PPP2CA         | 1.051 | 0.931 | 0.851 | 0.944 | 0.101 | -0.41 |
| Sharnin        | 0.799 | 0.818 | 1.243 | 0.953 | 0.251 | -0.41 |
| ADCK2          | 0.895 | 1.000 | 0.949 | 0.948 | 0.053 | -0.40 |
| AKAP12         | 0.977 | 0.901 | 0.968 | 0.949 | 0.042 | -0.40 |
| MTMR3          | 0.946 | 0.983 | 0.912 | 0.947 | 0.036 | -0.40 |
| PLK3           | 1.034 | 0.921 | 0.885 | 0.947 | 0.078 | -0.40 |
| PPP2R1B        | 0.922 | 0.886 | 1.041 | 0.950 | 0.081 | -0.40 |
| PTPN7          | 0.881 | 1.096 | 0.862 | 0.946 | 0.130 | -0.40 |
| RPS6KC1        | 0.951 | 0.932 | 0.963 | 0.949 | 0.016 | -0.40 |
| ERK8 (\$)      | 1.028 | 0.871 | 0.844 | 0.914 | 0.099 | -0.40 |
| IRAK1 (\$)     | 0.833 | 0.871 | 1.062 | 0.922 | 0.123 | -0.40 |
| LOC391295 (\$) | 0.944 | 0.871 | 0.938 | 0.918 | 0.041 | -0.40 |
| PPP1R10        | 0.958 | 0.926 | 0.963 | 0.949 | 0.020 | -0.39 |
| SUMO1P3        | 0.979 | 0.940 | 0.926 | 0.948 | 0.027 | -0.39 |
| LIMK1          | 0.960 | 1.000 | 0.886 | 0.949 | 0.058 | -0.38 |
| MAPK6          | 0.926 | 0.880 | 1.049 | 0.952 | 0.087 | -0.38 |
| PTPRC          | 1.018 | 1.023 | 0.799 | 0.947 | 0.128 | -0.38 |
| ALK            | 0.960 | 0.964 | 0.928 | 0.951 | 0.020 | -0.37 |
| HCK            | 0.923 | 1.041 | 0.887 | 0.950 | 0.081 | -0.37 |
| ITPKB          | 1.076 | 0.939 | 0.834 | 0.950 | 0.121 | -0.37 |
| MAPK8IP1       | 0.937 | 1.058 | 0.851 | 0.949 | 0.104 | -0.37 |
| STYK1          | 1.000 | 0.858 | 1.000 | 0.953 | 0.082 | -0.37 |
| MAPK4 (\$)     | 1.068 | 0.974 | 0.750 | 0.931 | 0.163 | -0.37 |

|                |       |       |       |       |       |       |
|----------------|-------|-------|-------|-------|-------|-------|
| PPP2R3B        | 0.958 | 1.037 | 0.856 | 0.950 | 0.091 | -0.36 |
| PPP6C          | 1.038 | 0.968 | 0.846 | 0.951 | 0.097 | -0.36 |
| ASK            | 0.931 | 0.959 | 0.974 | 0.955 | 0.022 | -0.35 |
| PIP5K1A        | 0.929 | 0.937 | 1.000 | 0.955 | 0.039 | -0.35 |
| MAPK8          | 0.832 | 1.031 | 1.008 | 0.957 | 0.109 | -0.34 |
| TENC1          | 0.988 | 0.963 | 0.912 | 0.954 | 0.039 | -0.34 |
| XYLB           | 0.854 | 0.988 | 1.029 | 0.957 | 0.092 | -0.34 |
| CDKL3          | 0.982 | 0.977 | 0.907 | 0.955 | 0.042 | -0.33 |
| PPP2R5B        | 1.033 | 0.915 | 0.918 | 0.955 | 0.067 | -0.33 |
| STK38L         | 0.833 | 1.041 | 1.000 | 0.958 | 0.110 | -0.33 |
| PRKAR2B (\$)   | 1.041 | 0.769 | 1.000 | 0.937 | 0.147 | -0.33 |
| INPP5F         | 0.936 | 0.959 | 0.983 | 0.959 | 0.024 | -0.32 |
| PRKRA          | 1.039 | 1.000 | 0.826 | 0.955 | 0.113 | -0.32 |
| TRIO           | 0.899 | 0.959 | 1.019 | 0.959 | 0.060 | -0.32 |
| AK3L1          | 0.946 | 1.098 | 0.825 | 0.956 | 0.137 | -0.31 |
| CHEK1          | 0.898 | 0.974 | 1.010 | 0.961 | 0.057 | -0.31 |
| LPPR2          | 0.955 | 1.023 | 0.897 | 0.958 | 0.063 | -0.31 |
| MAPK7          | 0.950 | 0.948 | 0.982 | 0.960 | 0.019 | -0.31 |
| PIK3C2B        | 1.013 | 0.947 | 0.916 | 0.959 | 0.050 | -0.31 |
| PLK1           | 0.923 | 1.081 | 0.869 | 0.958 | 0.110 | -0.31 |
| DUSP21         | 0.965 | 0.885 | 1.036 | 0.962 | 0.076 | -0.30 |
| PPAP2C         | 0.897 | 1.041 | 0.942 | 0.960 | 0.074 | -0.30 |
| CDC25B         | 0.992 | 0.962 | 0.928 | 0.961 | 0.032 | -0.29 |
| CHKA           | 0.920 | 0.948 | 1.024 | 0.964 | 0.054 | -0.29 |
| PPP1R1B        | 0.979 | 0.925 | 0.983 | 0.962 | 0.032 | -0.29 |
| LOC391533 (\$) | 0.861 | 1.032 | 0.969 | 0.954 | 0.086 | -0.29 |
| EGFR           | 0.930 | 1.000 | 0.959 | 0.963 | 0.035 | -0.28 |
| PDXK           | 0.910 | 0.991 | 0.990 | 0.964 | 0.046 | -0.28 |
| PPP1R3B        | 0.906 | 0.992 | 0.994 | 0.964 | 0.050 | -0.28 |
| PTK9 (\$)      | 0.795 | 1.077 | 0.975 | 0.949 | 0.143 | -0.28 |
| CDKN2C         | 0.909 | 1.000 | 0.986 | 0.965 | 0.049 | -0.27 |
| PPP3CA         | 0.832 | 1.000 | 1.070 | 0.967 | 0.122 | -0.27 |
| RIPK5          | 0.915 | 0.971 | 1.012 | 0.966 | 0.049 | -0.27 |
| TK2            | 0.899 | 0.953 | 1.045 | 0.966 | 0.074 | -0.27 |
| TRAD           | 0.961 | 1.000 | 0.932 | 0.964 | 0.034 | -0.27 |
| PRKX (\$)      | 1.342 | 0.718 | 0.775 | 0.945 | 0.345 | -0.27 |
| DGKE           | 0.955 | 1.017 | 0.923 | 0.965 | 0.048 | -0.26 |
| ETNK2          | 0.878 | 1.114 | 0.901 | 0.964 | 0.130 | -0.26 |
| MARK2          | 0.991 | 0.988 | 0.915 | 0.965 | 0.043 | -0.26 |
| MGC40579       | 0.992 | 0.880 | 1.033 | 0.968 | 0.079 | -0.26 |
| VRK2           | 0.910 | 0.961 | 1.030 | 0.967 | 0.060 | -0.26 |
| HIPK1 (\$)     | 0.944 | 0.935 | 0.969 | 0.949 | 0.018 | -0.26 |



|            |       |       |       |       |       |       |
|------------|-------|-------|-------|-------|-------|-------|
| DGKG       | 0.944 | 1.000 | 0.957 | 0.967 | 0.029 | -0.25 |
| EPHB3      | 1.035 | 0.834 | 1.035 | 0.968 | 0.116 | -0.25 |
| NAGK       | 0.944 | 1.028 | 0.928 | 0.967 | 0.054 | -0.25 |
| LRRK1      | 0.958 | 0.922 | 1.029 | 0.970 | 0.054 | -0.24 |
| MAP2K1IP1  | 1.034 | 0.925 | 0.944 | 0.968 | 0.058 | -0.24 |
| MTMR4      | 1.081 | 0.964 | 0.852 | 0.966 | 0.115 | -0.24 |
| PIK3R4     | 0.921 | 0.921 | 1.072 | 0.971 | 0.087 | -0.24 |
| TPTE       | 0.946 | 0.977 | 0.985 | 0.969 | 0.021 | -0.24 |
| PRKCI (§)  | 1.014 | 1.026 | 0.825 | 0.955 | 0.113 | -0.24 |
| ADCK1      | 0.853 | 0.965 | 1.101 | 0.973 | 0.124 | -0.23 |
| G6PC3      | 0.947 | 0.994 | 0.971 | 0.971 | 0.024 | -0.23 |
| AURKC      | 0.983 | 0.890 | 1.045 | 0.973 | 0.078 | -0.22 |
| CHKB       | 0.964 | 0.967 | 0.990 | 0.974 | 0.014 | -0.21 |
| DYRK2      | 1.073 | 1.035 | 0.800 | 0.969 | 0.148 | -0.21 |
| MAP3K9     | 0.975 | 0.977 | 0.964 | 0.972 | 0.007 | -0.21 |
| PIP5K2B    | 0.879 | 0.997 | 1.045 | 0.974 | 0.085 | -0.21 |
| PPP4R1     | 0.930 | 1.000 | 0.990 | 0.973 | 0.038 | -0.21 |
| STK22B     | 0.997 | 0.984 | 0.934 | 0.972 | 0.033 | -0.21 |
| MAP2K3     | 0.914 | 0.974 | 1.039 | 0.976 | 0.063 | -0.20 |
| NME6       | 0.961 | 1.036 | 0.920 | 0.972 | 0.059 | -0.20 |
| WDSAM1     | 1.065 | 0.916 | 0.938 | 0.973 | 0.080 | -0.20 |
| DYRK1B     | 1.039 | 0.913 | 0.974 | 0.975 | 0.063 | -0.19 |
| PACSIN1    | 1.043 | 0.951 | 0.932 | 0.975 | 0.059 | -0.18 |
| MAP2K1 (§) | 1.096 | 1.000 | 0.800 | 0.965 | 0.151 | -0.18 |
| GNE        | 1.000 | 1.018 | 0.915 | 0.978 | 0.055 | -0.16 |
| PPP1R3A    | 1.053 | 0.933 | 0.949 | 0.978 | 0.065 | -0.16 |
| PPP1R7     | 0.907 | 0.936 | 1.104 | 0.982 | 0.106 | -0.16 |
| PTPN23     | 0.994 | 0.963 | 0.979 | 0.979 | 0.016 | -0.16 |
| TESK2      | 0.960 | 0.994 | 0.985 | 0.980 | 0.018 | -0.16 |
| DYRK3      | 0.905 | 1.134 | 0.897 | 0.979 | 0.135 | -0.15 |
| PDLIM5     | 1.011 | 0.977 | 0.950 | 0.979 | 0.031 | -0.15 |
| DGUOK      | 1.007 | 0.841 | 1.106 | 0.985 | 0.134 | -0.14 |
| EPHB1      | 0.960 | 0.988 | 0.996 | 0.981 | 0.019 | -0.14 |
| PPM1D      | 0.897 | 1.053 | 0.997 | 0.982 | 0.079 | -0.14 |
| STK31      | 0.976 | 0.893 | 1.084 | 0.984 | 0.096 | -0.14 |
| EIF2AK3    | 0.897 | 0.930 | 1.131 | 0.986 | 0.127 | -0.13 |
| HIPK2      | 1.079 | 0.977 | 0.888 | 0.981 | 0.096 | -0.13 |
| HSPB8      | 0.946 | 0.997 | 1.006 | 0.983 | 0.032 | -0.13 |
| LOC91807   | 0.979 | 1.085 | 0.877 | 0.980 | 0.104 | -0.13 |
| RNGTT      | 0.880 | 1.024 | 1.052 | 0.985 | 0.092 | -0.12 |
| WNK3       | 1.018 | 0.992 | 0.940 | 0.983 | 0.040 | -0.12 |
| MARCKS (§) | 1.000 | 1.194 | 0.781 | 0.992 | 0.207 | -0.12 |

|              |       |       |       |       |       |       |
|--------------|-------|-------|-------|-------|-------|-------|
| PPP1R3F (\$) | 0.972 | 1.032 | 0.938 | 0.981 | 0.048 | -0.12 |
| STK3 (\$)    | 0.932 | 1.154 | 0.850 | 0.979 | 0.157 | -0.12 |
| GALK1        | 0.997 | 1.012 | 0.945 | 0.985 | 0.035 | -0.11 |
| MAP3K7       | 0.983 | 1.012 | 0.961 | 0.985 | 0.026 | -0.11 |
| PRKCQ        | 1.062 | 0.995 | 0.894 | 0.984 | 0.085 | -0.11 |
| PRKD3        | 0.982 | 0.814 | 1.174 | 0.990 | 0.180 | -0.11 |
| RPS6KA6      | 1.006 | 0.945 | 1.006 | 0.986 | 0.035 | -0.11 |
| SGK2         | 1.006 | 1.000 | 0.950 | 0.985 | 0.031 | -0.11 |
| STK23        | 1.012 | 1.049 | 0.888 | 0.983 | 0.084 | -0.11 |
| DCAMKL1      | 0.931 | 0.906 | 1.131 | 0.989 | 0.123 | -0.10 |
| PIK3R3       | 0.929 | 0.896 | 1.146 | 0.990 | 0.136 | -0.10 |
| PPFIA1       | 0.952 | 0.997 | 1.015 | 0.988 | 0.032 | -0.10 |
| PTPN1        | 1.028 | 1.098 | 0.823 | 0.983 | 0.143 | -0.10 |
| UHMK1        | 0.992 | 0.964 | 1.007 | 0.988 | 0.022 | -0.10 |
| UMP-CMPK     | 0.866 | 0.847 | 1.267 | 0.993 | 0.237 | -0.10 |
| ARHGAP26     | 1.006 | 1.029 | 0.925 | 0.987 | 0.055 | -0.09 |
| BMPR2        | 1.190 | 0.974 | 0.790 | 0.985 | 0.200 | -0.09 |
| BRSK1        | 1.041 | 1.008 | 0.908 | 0.986 | 0.069 | -0.09 |
| FES          | 0.937 | 1.028 | 1.000 | 0.988 | 0.047 | -0.09 |
| PPP4C        | 0.958 | 1.000 | 1.008 | 0.989 | 0.027 | -0.09 |
| NEK4 (\$)    | 1.096 | 0.974 | 0.875 | 0.982 | 0.111 | -0.09 |
| AKAP8L       | 0.976 | 0.853 | 1.149 | 0.993 | 0.149 | -0.08 |
| JAK2         | 0.918 | 0.945 | 1.114 | 0.992 | 0.106 | -0.08 |
| M-RIP        | 1.036 | 0.935 | 0.997 | 0.989 | 0.051 | -0.08 |
| PPM1E        | 1.086 | 0.982 | 0.893 | 0.987 | 0.097 | -0.08 |
| BMX (\$)     | 0.944 | 1.065 | 0.969 | 0.993 | 0.064 | -0.08 |
| PRPS1L1 (\$) | 1.028 | 0.903 | 1.000 | 0.977 | 0.066 | -0.08 |
| ROS1 (\$)    | 0.932 | 0.974 | 1.050 | 0.985 | 0.060 | -0.08 |
| ALPK1        | 0.979 | 1.000 | 0.993 | 0.991 | 0.011 | -0.07 |
| CINP         | 1.012 | 1.101 | 0.851 | 0.988 | 0.127 | -0.07 |
| FLJ13052     | 1.063 | 0.979 | 0.928 | 0.990 | 0.068 | -0.07 |
| SBF1         | 1.024 | 0.963 | 0.985 | 0.991 | 0.031 | -0.07 |
| STK10        | 0.929 | 1.045 | 1.000 | 0.991 | 0.058 | -0.07 |
| STK38        | 1.080 | 0.924 | 0.968 | 0.991 | 0.080 | -0.07 |
| TLK2         | 0.943 | 0.994 | 1.038 | 0.992 | 0.048 | -0.07 |
| MAPK8IP3     | 0.940 | 1.067 | 0.970 | 0.992 | 0.066 | -0.06 |
| PPP1R1C      | 1.051 | 0.985 | 0.937 | 0.991 | 0.057 | -0.06 |
| TEK          | 0.966 | 0.973 | 1.040 | 0.993 | 0.041 | -0.06 |
| ACVR2 (\$)   | 0.944 | 0.839 | 1.156 | 0.980 | 0.161 | -0.06 |
| GKAP1        | 1.042 | 0.972 | 0.964 | 0.993 | 0.043 | -0.05 |
| MASTL        | 1.105 | 0.957 | 0.913 | 0.992 | 0.101 | -0.05 |
| MERTK        | 0.826 | 1.144 | 1.010 | 0.993 | 0.160 | -0.05 |

|            |       |       |       |       |       |       |
|------------|-------|-------|-------|-------|-------|-------|
| UCK2       | 1.017 | 0.843 | 1.129 | 0.996 | 0.144 | -0.05 |
| IRAK4      | 0.994 | 1.003 | 0.988 | 0.995 | 0.008 | -0.04 |
| MATK       | 0.916 | 1.034 | 1.035 | 0.995 | 0.068 | -0.04 |
| PFTK1      | 1.000 | 1.122 | 0.853 | 0.992 | 0.135 | -0.04 |
| RPS6KL1    | 1.049 | 0.915 | 1.022 | 0.995 | 0.071 | -0.04 |
| ZAP70      | 1.003 | 1.051 | 0.924 | 0.993 | 0.064 | -0.04 |
| ACVR2B (§) | 0.889 | 1.129 | 1.000 | 1.006 | 0.120 | -0.04 |
| CSNK1D     | 0.927 | 1.033 | 1.031 | 0.997 | 0.061 | -0.03 |
| DMPK       | 1.113 | 0.931 | 0.943 | 0.996 | 0.102 | -0.03 |
| INPP5A     | 1.051 | 0.956 | 0.980 | 0.996 | 0.049 | -0.03 |
| PDPK1      | 1.200 | 0.765 | 1.028 | 0.998 | 0.219 | -0.03 |
| SNF1LK     | 1.005 | 0.961 | 1.022 | 0.996 | 0.031 | -0.03 |
| MARK1      | 1.025 | 1.000 | 0.964 | 0.996 | 0.031 | -0.02 |
| PACSIN3    | 0.959 | 0.984 | 1.054 | 0.999 | 0.049 | -0.02 |
| PIK3R5     | 1.085 | 1.029 | 0.870 | 0.995 | 0.112 | -0.02 |
| PPP1R2     | 1.008 | 0.985 | 1.000 | 0.998 | 0.012 | -0.02 |
| PPP2CB     | 0.952 | 1.026 | 1.015 | 0.998 | 0.040 | -0.02 |
| SKIP       | 1.000 | 0.972 | 1.022 | 0.998 | 0.025 | -0.02 |
| STK32B (§) | 1.167 | 0.742 | 1.000 | 0.970 | 0.214 | -0.02 |
| INPP5D     | 1.098 | 0.936 | 0.958 | 0.997 | 0.088 | -0.01 |
| KIDINS220  | 1.047 | 1.041 | 0.900 | 0.996 | 0.083 | -0.01 |
| MAPKAPK3   | 1.039 | 1.029 | 0.923 | 0.997 | 0.064 | -0.01 |
| PPAP2A     | 1.060 | 0.990 | 0.943 | 0.998 | 0.059 | -0.01 |
| PPAP2B     | 1.058 | 1.000 | 0.935 | 0.998 | 0.062 | -0.01 |
| PTPRQ      | 0.882 | 1.060 | 1.057 | 1.000 | 0.102 | -0.01 |
| AKAP4      | 1.003 | 0.973 | 1.025 | 1.000 | 0.026 | 0.00  |
| AKT3       | 0.893 | 0.976 | 1.138 | 1.002 | 0.125 | 0.00  |
| FLT3LG     | 1.007 | 1.000 | 0.993 | 1.000 | 0.007 | 0.00  |
| CLK3       | 0.994 | 1.030 | 0.978 | 1.001 | 0.027 | 0.01  |
| LMTK2      | 1.017 | 0.874 | 1.119 | 1.003 | 0.123 | 0.01  |
| LOC407835  | 1.016 | 1.048 | 0.935 | 1.000 | 0.058 | 0.01  |
| PAK4       | 0.931 | 0.982 | 1.096 | 1.003 | 0.084 | 0.01  |
| PAK6       | 0.953 | 1.017 | 1.036 | 1.002 | 0.043 | 0.01  |
| ULK3       | 0.984 | 0.940 | 1.084 | 1.003 | 0.074 | 0.01  |
| HK1        | 0.923 | 0.993 | 1.099 | 1.005 | 0.089 | 0.02  |
| PINK1      | 1.105 | 0.965 | 0.935 | 1.002 | 0.091 | 0.02  |
| PLK2       | 0.955 | 0.982 | 1.074 | 1.004 | 0.062 | 0.02  |
| TYRO3      | 1.040 | 1.099 | 0.859 | 0.999 | 0.125 | 0.02  |
| CALM3      | 0.956 | 1.059 | 0.997 | 1.004 | 0.052 | 0.03  |
| TLK1       | 1.149 | 1.023 | 0.828 | 1.000 | 0.162 | 0.03  |
| TNK1       | 1.015 | 1.051 | 0.939 | 1.002 | 0.057 | 0.03  |
| TTK        | 0.997 | 0.973 | 1.045 | 1.005 | 0.037 | 0.03  |

|            |       |       |       |       |       |      |
|------------|-------|-------|-------|-------|-------|------|
| GRK5 (§)   | 0.861 | 1.065 | 1.125 | 1.017 | 0.138 | 0.03 |
| AK5        | 0.934 | 1.054 | 1.030 | 1.006 | 0.063 | 0.04 |
| MAP4K3     | 0.861 | 1.093 | 1.066 | 1.007 | 0.127 | 0.04 |
| MUSK       | 1.070 | 0.919 | 1.030 | 1.006 | 0.078 | 0.04 |
| UCK1       | 0.923 | 1.092 | 1.000 | 1.005 | 0.085 | 0.04 |
| MAPK12 (§) | 0.849 | 1.282 | 0.900 | 1.010 | 0.237 | 0.04 |
| ATM        | 1.036 | 0.895 | 1.093 | 1.008 | 0.102 | 0.05 |
| CCRK       | 0.878 | 0.893 | 1.267 | 1.013 | 0.220 | 0.05 |
| CDC42SE2   | 0.937 | 1.028 | 1.058 | 1.008 | 0.063 | 0.05 |
| PDGFRB     | 1.006 | 1.023 | 0.988 | 1.006 | 0.018 | 0.05 |
| PRKAB2     | 0.932 | 1.021 | 1.070 | 1.008 | 0.070 | 0.05 |
| CERK       | 1.012 | 1.058 | 0.948 | 1.006 | 0.055 | 0.06 |
| CTDSP2     | 0.908 | 0.982 | 1.141 | 1.010 | 0.119 | 0.06 |
| EPS8L1     | 0.976 | 1.049 | 1.000 | 1.008 | 0.037 | 0.06 |
| MAPKAPK5   | 0.954 | 0.973 | 1.101 | 1.009 | 0.080 | 0.06 |
| PKMYT1     | 1.050 | 0.965 | 1.006 | 1.007 | 0.043 | 0.06 |
| PPP3CC     | 0.953 | 1.118 | 0.946 | 1.006 | 0.097 | 0.06 |
| STK29      | 1.164 | 0.973 | 0.879 | 1.005 | 0.145 | 0.06 |
| STK33      | 0.959 | 0.876 | 1.203 | 1.013 | 0.170 | 0.06 |
| AKAP11     | 1.163 | 0.916 | 0.945 | 1.008 | 0.135 | 0.07 |
| CLK1       | 1.044 | 0.980 | 1.003 | 1.009 | 0.032 | 0.07 |
| PIK3C3     | 1.045 | 0.867 | 1.124 | 1.012 | 0.132 | 0.07 |
| PTPRF      | 0.724 | 1.189 | 1.120 | 1.011 | 0.251 | 0.07 |
| NEK11      | 1.000 | 1.058 | 0.972 | 1.010 | 0.044 | 0.08 |
| MAP2K7 (§) | 0.849 | 1.103 | 1.100 | 1.017 | 0.146 | 0.08 |
| TTBK2 (§)  | 0.972 | 1.097 | 1.000 | 1.023 | 0.066 | 0.08 |
| IRAK1BP1   | 1.092 | 0.950 | 0.993 | 1.012 | 0.073 | 0.09 |
| PLK4       | 0.876 | 1.144 | 1.016 | 1.012 | 0.134 | 0.09 |
| PPP2R2C    | 1.103 | 1.029 | 0.896 | 1.009 | 0.105 | 0.09 |
| PTPN5      | 1.088 | 0.970 | 0.977 | 1.012 | 0.066 | 0.09 |
| RET        | 0.914 | 1.078 | 1.044 | 1.012 | 0.087 | 0.09 |
| RIPK4      | 1.049 | 0.840 | 1.155 | 1.015 | 0.160 | 0.09 |
| TAOK1      | 1.047 | 1.000 | 0.988 | 1.012 | 0.031 | 0.09 |
| VRK1       | 1.017 | 1.000 | 1.019 | 1.012 | 0.010 | 0.09 |
| BMPR1A     | 0.938 | 1.012 | 1.094 | 1.015 | 0.078 | 0.10 |
| CAMK1      | 0.927 | 0.913 | 1.213 | 1.018 | 0.169 | 0.10 |
| CAMK1G     | 1.118 | 1.074 | 0.837 | 1.010 | 0.151 | 0.10 |
| ETNK1      | 1.000 | 0.967 | 1.076 | 1.014 | 0.056 | 0.10 |
| GIT2       | 0.989 | 1.053 | 0.997 | 1.013 | 0.035 | 0.10 |
| HGS        | 0.961 | 0.814 | 1.284 | 1.020 | 0.240 | 0.10 |
| MAK        | 1.000 | 1.087 | 0.947 | 1.011 | 0.071 | 0.10 |
| TBK1       | 1.003 | 1.022 | 1.012 | 1.012 | 0.010 | 0.10 |

|            |       |       |       |       |       |      |
|------------|-------|-------|-------|-------|-------|------|
| PHKA1      | 1.019 | 0.988 | 1.036 | 1.014 | 0.024 | 0.11 |
| SYK        | 0.849 | 0.860 | 1.355 | 1.021 | 0.289 | 0.11 |
| CDKL1      | 1.017 | 1.006 | 1.026 | 1.016 | 0.010 | 0.12 |
| HIPK3      | 0.828 | 1.029 | 1.201 | 1.019 | 0.187 | 0.12 |
| PPP1CC     | 1.009 | 0.946 | 1.099 | 1.018 | 0.077 | 0.12 |
| WNK1       | 0.979 | 1.007 | 1.065 | 1.017 | 0.044 | 0.12 |
| INPP5B     | 0.925 | 1.078 | 1.048 | 1.017 | 0.081 | 0.13 |
| NTRK2      | 1.097 | 0.947 | 1.007 | 1.017 | 0.075 | 0.13 |
| STK11IP    | 0.968 | 1.078 | 1.004 | 1.017 | 0.056 | 0.13 |
| PRKDC (§)  | 1.111 | 0.774 | 1.125 | 1.003 | 0.199 | 0.13 |
| ABL1       | 1.080 | 1.059 | 0.907 | 1.015 | 0.094 | 0.14 |
| PPP2R5E    | 0.942 | 1.201 | 0.903 | 1.015 | 0.162 | 0.14 |
| CLK4       | 1.166 | 0.992 | 0.892 | 1.017 | 0.139 | 0.15 |
| DUSP2      | 0.927 | 1.190 | 0.938 | 1.018 | 0.149 | 0.15 |
| EEF2K      | 1.079 | 1.003 | 0.976 | 1.019 | 0.053 | 0.15 |
| IKBKAP     | 1.108 | 1.099 | 0.838 | 1.015 | 0.153 | 0.15 |
| NME4       | 0.981 | 1.081 | 0.994 | 1.019 | 0.054 | 0.15 |
| SGKL       | 0.965 | 1.105 | 0.988 | 1.019 | 0.075 | 0.15 |
| TAOK2 2    | 0.971 | 1.000 | 1.090 | 1.020 | 0.062 | 0.15 |
| BCR (§)    | 0.889 | 1.226 | 1.031 | 1.049 | 0.169 | 0.15 |
| PPM1B      | 1.053 | 1.003 | 1.005 | 1.020 | 0.028 | 0.16 |
| ROCK2      | 1.034 | 0.982 | 1.048 | 1.021 | 0.035 | 0.16 |
| TGFBR1     | 0.997 | 1.003 | 1.066 | 1.022 | 0.038 | 0.16 |
| ULK2       | 1.006 | 1.000 | 1.061 | 1.022 | 0.034 | 0.16 |
| STK39 (§)  | 1.056 | 1.194 | 0.875 | 1.042 | 0.160 | 0.16 |
| MAST4      | 1.091 | 1.079 | 0.886 | 1.019 | 0.115 | 0.17 |
| PTK9L      | 1.121 | 0.877 | 1.073 | 1.024 | 0.129 | 0.17 |
| SKIP       | 1.114 | 0.988 | 0.962 | 1.021 | 0.081 | 0.17 |
| AKAP14 (§) | 0.917 | 1.000 | 1.188 | 1.035 | 0.139 | 0.17 |
| CNKSRI     | 1.017 | 1.096 | 0.952 | 1.022 | 0.072 | 0.18 |
| DUSP13     | 1.042 | 0.929 | 1.107 | 1.026 | 0.090 | 0.18 |
| PHKA2      | 0.949 | 1.121 | 1.000 | 1.023 | 0.088 | 0.18 |
| TAOK2 1    | 0.851 | 1.123 | 1.102 | 1.025 | 0.151 | 0.18 |
| MOS        | 0.923 | 1.072 | 1.084 | 1.026 | 0.090 | 0.19 |
| PPP1R3D    | 1.013 | 0.997 | 1.067 | 1.026 | 0.037 | 0.19 |
| PPP2R2B    | 1.084 | 1.064 | 0.918 | 1.022 | 0.091 | 0.19 |
| KIAA1804   | 1.049 | 1.035 | 0.993 | 1.026 | 0.029 | 0.20 |
| MAP3K2     | 1.067 | 1.090 | 0.913 | 1.023 | 0.096 | 0.20 |
| RIOK3      | 1.022 | 1.163 | 0.884 | 1.023 | 0.140 | 0.20 |
| MAPK9 (§)  | 1.233 | 0.872 | 1.000 | 1.035 | 0.183 | 0.20 |
| ALS2CR2    | 0.935 | 0.868 | 1.299 | 1.034 | 0.232 | 0.21 |
| HUNK       | 0.953 | 1.016 | 1.120 | 1.030 | 0.084 | 0.21 |

|             |       |       |       |       |       |      |
|-------------|-------|-------|-------|-------|-------|------|
| SNF1LK2     | 1.054 | 1.067 | 0.958 | 1.026 | 0.060 | 0.21 |
| TESK1       | 1.077 | 0.901 | 1.111 | 1.030 | 0.113 | 0.21 |
| EIF2AK1     | 1.167 | 0.952 | 0.964 | 1.028 | 0.121 | 0.22 |
| PRKCE       | 1.103 | 0.953 | 1.029 | 1.028 | 0.075 | 0.22 |
| PSKH1       | 1.103 | 1.073 | 0.904 | 1.027 | 0.107 | 0.22 |
| PTPN6       | 0.987 | 1.096 | 1.000 | 1.028 | 0.060 | 0.22 |
| SMG1        | 1.047 | 0.946 | 1.096 | 1.030 | 0.076 | 0.22 |
| PRKACB (§)  | 0.877 | 1.154 | 1.100 | 1.044 | 0.147 | 0.22 |
| RPS6KA2 (§) | 1.370 | 1.077 | 0.675 | 1.041 | 0.349 | 0.22 |
| ITK         | 0.951 | 1.083 | 1.057 | 1.030 | 0.070 | 0.23 |
| MAGI-3      | 1.016 | 1.045 | 1.028 | 1.030 | 0.015 | 0.23 |
| MAPKAPK2    | 0.899 | 1.204 | 0.984 | 1.029 | 0.157 | 0.23 |
| PFKP        | 1.013 | 1.116 | 0.958 | 1.029 | 0.080 | 0.23 |
| PTP4A2      | 1.019 | 1.047 | 1.024 | 1.030 | 0.015 | 0.23 |
| RIOK1       | 0.958 | 1.142 | 0.986 | 1.029 | 0.099 | 0.23 |
| PRKRIR (§)  | 0.932 | 1.077 | 1.125 | 1.045 | 0.100 | 0.23 |
| ADRBK2      | 1.029 | 0.837 | 1.244 | 1.037 | 0.204 | 0.24 |
| APEG1       | 1.023 | 1.000 | 1.073 | 1.032 | 0.037 | 0.24 |
| PCK1        | 1.045 | 1.041 | 1.007 | 1.031 | 0.021 | 0.24 |
| PTPRB       | 1.246 | 1.010 | 0.825 | 1.027 | 0.211 | 0.24 |
| CSNK1E      | 1.015 | 1.131 | 0.948 | 1.031 | 0.093 | 0.25 |
| PRKCBP1     | 0.984 | 0.978 | 1.145 | 1.036 | 0.095 | 0.25 |
| RIPK1       | 0.960 | 1.212 | 0.919 | 1.030 | 0.159 | 0.25 |
| PRKG2 (§)   | 1.041 | 0.974 | 1.125 | 1.047 | 0.076 | 0.25 |
| IKBKG       | 1.071 | 1.140 | 0.879 | 1.030 | 0.135 | 0.26 |
| PANK4       | 0.927 | 0.899 | 1.292 | 1.039 | 0.219 | 0.26 |
| PGK1        | 1.032 | 1.003 | 1.070 | 1.035 | 0.034 | 0.26 |
| PTPDC1      | 1.024 | 1.038 | 1.042 | 1.035 | 0.009 | 0.26 |
| RAGE        | 0.914 | 0.948 | 1.252 | 1.038 | 0.186 | 0.26 |
| TEC         | 1.039 | 1.006 | 1.058 | 1.034 | 0.026 | 0.26 |
| TNNI3K      | 0.982 | 1.114 | 1.006 | 1.034 | 0.070 | 0.26 |
| CAMK4       | 0.796 | 1.033 | 1.292 | 1.040 | 0.248 | 0.27 |
| DUSP10      | 1.000 | 0.997 | 1.113 | 1.037 | 0.066 | 0.27 |
| PRKCABP     | 1.034 | 1.024 | 1.048 | 1.035 | 0.012 | 0.27 |
| RBKS        | 0.958 | 0.929 | 1.232 | 1.040 | 0.167 | 0.27 |
| DUSP3       | 0.991 | 1.103 | 1.014 | 1.036 | 0.059 | 0.28 |
| PPP1R14C    | 1.009 | 1.060 | 1.040 | 1.036 | 0.026 | 0.28 |
| PTPN11      | 1.051 | 1.010 | 1.048 | 1.036 | 0.023 | 0.28 |
| DDR2        | 1.025 | 1.098 | 0.988 | 1.037 | 0.056 | 0.29 |
| PASK        | 1.161 | 0.971 | 0.976 | 1.036 | 0.108 | 0.29 |
| TNIK        | 1.180 | 0.908 | 1.024 | 1.037 | 0.136 | 0.29 |
| CAMK1D      | 1.021 | 1.007 | 1.094 | 1.041 | 0.047 | 0.30 |

|          |       |       |       |       |       |      |
|----------|-------|-------|-------|-------|-------|------|
| MAP3K13  | 1.000 | 0.994 | 1.131 | 1.042 | 0.077 | 0.30 |
| NUCKS    | 0.870 | 1.033 | 1.227 | 1.043 | 0.179 | 0.30 |
| PAK7     | 1.000 | 0.986 | 1.138 | 1.041 | 0.084 | 0.30 |
| PKIG     | 1.241 | 1.018 | 0.845 | 1.035 | 0.199 | 0.30 |
| PPP2R3A  | 0.967 | 1.093 | 1.059 | 1.040 | 0.065 | 0.30 |
| GSK3B    | 1.162 | 0.938 | 1.021 | 1.040 | 0.113 | 0.31 |
| ICK      | 1.163 | 0.958 | 0.997 | 1.039 | 0.109 | 0.31 |
| MADD     | 1.071 | 1.104 | 0.939 | 1.038 | 0.087 | 0.31 |
| PIM2     | 1.062 | 1.096 | 0.958 | 1.039 | 0.072 | 0.31 |
| CAMKK2   | 1.023 | 1.164 | 0.933 | 1.040 | 0.116 | 0.32 |
| CDKN3    | 1.165 | 0.915 | 1.046 | 1.042 | 0.125 | 0.32 |
| PPM1M    | 1.059 | 1.019 | 1.049 | 1.042 | 0.021 | 0.32 |
| TNK2     | 0.989 | 1.024 | 1.119 | 1.044 | 0.067 | 0.32 |
| TP53RK   | 0.935 | 1.066 | 1.131 | 1.044 | 0.100 | 0.32 |
| INPP4B   | 1.096 | 1.003 | 1.031 | 1.043 | 0.048 | 0.33 |
| MTMR8    | 1.125 | 0.959 | 1.045 | 1.043 | 0.083 | 0.33 |
| AXL      | 1.066 | 0.948 | 1.127 | 1.047 | 0.091 | 0.34 |
| EPHA4    | 1.014 | 1.124 | 0.993 | 1.044 | 0.070 | 0.34 |
| PPP2R2A  | 0.967 | 1.090 | 1.077 | 1.045 | 0.068 | 0.34 |
| PRPF4B   | 1.022 | 1.017 | 1.097 | 1.045 | 0.045 | 0.34 |
| TYK2     | 1.084 | 1.057 | 0.990 | 1.044 | 0.048 | 0.34 |
| PSTPIP1  | 1.036 | 1.095 | 1.003 | 1.045 | 0.047 | 0.35 |
| STK32A   | 1.097 | 1.036 | 1.001 | 1.045 | 0.049 | 0.35 |
| TAOK3    | 0.927 | 0.971 | 1.253 | 1.050 | 0.177 | 0.35 |
| NEK8 (§) | 1.139 | 0.968 | 1.062 | 1.056 | 0.086 | 0.35 |
| CDKL4    | 0.989 | 1.014 | 1.146 | 1.050 | 0.084 | 0.36 |
| ERN1     | 1.003 | 1.061 | 1.077 | 1.047 | 0.039 | 0.36 |
| MAP3K1   | 0.981 | 1.078 | 1.084 | 1.048 | 0.058 | 0.36 |
| SRMS     | 1.056 | 1.219 | 0.852 | 1.042 | 0.184 | 0.36 |
| STK4 (§) | 1.151 | 1.026 | 1.025 | 1.067 | 0.072 | 0.36 |
| PANK1    | 1.047 | 0.965 | 1.139 | 1.050 | 0.087 | 0.37 |
| TPK1     | 1.022 | 0.984 | 1.145 | 1.050 | 0.084 | 0.37 |
| AKAP10   | 1.112 | 1.030 | 1.003 | 1.048 | 0.057 | 0.38 |
| ARK5     | 0.944 | 1.054 | 1.158 | 1.052 | 0.107 | 0.38 |
| EPHB4    | 1.000 | 1.186 | 0.957 | 1.048 | 0.122 | 0.38 |
| PPEF2    | 1.140 | 0.980 | 1.031 | 1.050 | 0.082 | 0.39 |
| PTEN     | 1.037 | 1.059 | 1.059 | 1.052 | 0.013 | 0.39 |
| PTPRV    | 1.118 | 1.015 | 1.017 | 1.050 | 0.059 | 0.39 |
| PACSIN2  | 1.287 | 0.836 | 1.032 | 1.052 | 0.226 | 0.40 |
| PRKCH    | 1.068 | 1.094 | 0.992 | 1.051 | 0.053 | 0.40 |
| SSTK     | 1.041 | 1.025 | 1.100 | 1.055 | 0.040 | 0.41 |
| AKAP3    | 0.966 | 1.099 | 1.102 | 1.056 | 0.078 | 0.42 |

|              |       |       |       |       |       |      |
|--------------|-------|-------|-------|-------|-------|------|
| CARKL        | 1.098 | 1.225 | 0.826 | 1.050 | 0.204 | 0.42 |
| CHEK2        | 1.017 | 1.152 | 0.991 | 1.053 | 0.086 | 0.42 |
| ENPP1        | 1.164 | 1.005 | 0.992 | 1.054 | 0.096 | 0.42 |
| PBK          | 0.965 | 0.957 | 1.254 | 1.059 | 0.169 | 0.42 |
| PPTC7        | 1.006 | 1.115 | 1.042 | 1.054 | 0.056 | 0.42 |
| PTPN9        | 0.967 | 1.230 | 0.959 | 1.052 | 0.154 | 0.42 |
| MAP3K3 (§)   | 1.222 | 0.935 | 1.031 | 1.063 | 0.146 | 0.42 |
| ACVRL1       | 0.915 | 1.115 | 1.144 | 1.058 | 0.125 | 0.43 |
| BCKDK        | 1.000 | 1.158 | 1.009 | 1.056 | 0.089 | 0.43 |
| EPHA2        | 0.997 | 1.073 | 1.100 | 1.057 | 0.053 | 0.43 |
| ITPK1        | 0.761 | 1.193 | 1.227 | 1.060 | 0.260 | 0.43 |
| PTPRN2       | 0.930 | 1.166 | 1.072 | 1.056 | 0.119 | 0.43 |
| ALS2CR7      | 1.049 | 1.078 | 1.043 | 1.057 | 0.019 | 0.44 |
| PIP5K1C      | 1.091 | 1.107 | 0.969 | 1.056 | 0.075 | 0.44 |
| PPP3CB       | 0.967 | 1.078 | 1.132 | 1.059 | 0.084 | 0.44 |
| PRKCZ        | 1.068 | 0.974 | 1.138 | 1.060 | 0.082 | 0.44 |
| PSKH2        | 1.006 | 1.033 | 1.139 | 1.059 | 0.070 | 0.44 |
| PSTPIP2      | 1.070 | 1.095 | 1.003 | 1.056 | 0.048 | 0.44 |
| RPS6KA1 (§)  | 1.315 | 0.897 | 1.025 | 1.079 | 0.214 | 0.44 |
| ACVR1        | 0.949 | 1.020 | 1.216 | 1.062 | 0.138 | 0.45 |
| EPHA8        | 1.222 | 1.134 | 0.804 | 1.053 | 0.220 | 0.45 |
| MAP3K6 (§)   | 1.083 | 0.839 | 1.281 | 1.068 | 0.221 | 0.45 |
| BMP2K        | 1.049 | 1.007 | 1.130 | 1.062 | 0.063 | 0.46 |
| HK3          | 1.003 | 1.171 | 1.004 | 1.059 | 0.097 | 0.46 |
| IHPK2        | 1.186 | 1.079 | 0.904 | 1.056 | 0.142 | 0.46 |
| PPP1R14A     | 1.082 | 1.015 | 1.086 | 1.061 | 0.040 | 0.46 |
| CSNK2A1      | 1.165 | 1.152 | 0.856 | 1.058 | 0.175 | 0.47 |
| EPHA1        | 1.141 | 0.972 | 1.071 | 1.061 | 0.085 | 0.47 |
| STK17B       | 1.112 | 0.952 | 1.125 | 1.063 | 0.096 | 0.47 |
| TK1          | 1.089 | 0.988 | 1.110 | 1.062 | 0.065 | 0.47 |
| AKAP1        | 1.123 | 1.157 | 0.897 | 1.059 | 0.141 | 0.48 |
| IBTK         | 1.054 | 0.990 | 1.151 | 1.065 | 0.081 | 0.48 |
| PPP1R9B      | 1.118 | 1.068 | 1.000 | 1.062 | 0.059 | 0.48 |
| PTP4A3       | 1.108 | 0.990 | 1.093 | 1.064 | 0.064 | 0.48 |
| T3JAM        | 1.136 | 1.083 | 0.964 | 1.061 | 0.088 | 0.48 |
| MAPK13 (§)   | 0.795 | 1.128 | 1.350 | 1.091 | 0.279 | 0.48 |
| DUSP14       | 1.131 | 1.024 | 1.038 | 1.064 | 0.058 | 0.49 |
| NLK          | 1.030 | 1.036 | 1.130 | 1.065 | 0.056 | 0.49 |
| STK17A       | 1.079 | 0.958 | 1.164 | 1.067 | 0.104 | 0.49 |
| CSNK1A1L (§) | 1.000 | 1.032 | 1.250 | 1.094 | 0.136 | 0.49 |
| AKAP9        | 1.057 | 1.088 | 1.050 | 1.065 | 0.020 | 0.50 |
| DAPK2        | 1.054 | 1.137 | 1.000 | 1.064 | 0.069 | 0.50 |



|             |       |       |       |       |       |      |
|-------------|-------|-------|-------|-------|-------|------|
| SH3KBP1     | 0.884 | 1.023 | 1.304 | 1.070 | 0.214 | 0.50 |
| NEK2        | 1.000 | 1.053 | 1.154 | 1.069 | 0.078 | 0.51 |
| NME7        | 1.148 | 1.149 | 0.892 | 1.063 | 0.148 | 0.51 |
| PPP1R8      | 1.103 | 0.985 | 1.115 | 1.068 | 0.072 | 0.51 |
| RPS6KA4     | 1.101 | 1.000 | 1.103 | 1.068 | 0.059 | 0.51 |
| CKS2        | 1.000 | 1.222 | 0.976 | 1.066 | 0.136 | 0.52 |
| DYRK1A      | 0.991 | 1.122 | 1.092 | 1.068 | 0.069 | 0.52 |
| DYRK4       | 1.078 | 1.116 | 1.006 | 1.067 | 0.056 | 0.52 |
| FASTK       | 1.149 | 1.000 | 1.055 | 1.068 | 0.075 | 0.52 |
| MTMR2       | 1.042 | 1.084 | 1.077 | 1.068 | 0.023 | 0.52 |
| NME3        | 1.096 | 0.965 | 1.148 | 1.070 | 0.094 | 0.52 |
| STK19       | 1.071 | 1.128 | 1.000 | 1.066 | 0.064 | 0.52 |
| AKAP5       | 0.983 | 1.070 | 1.160 | 1.071 | 0.089 | 0.53 |
| GIT1        | 1.091 | 1.055 | 1.062 | 1.069 | 0.019 | 0.53 |
| PIK3C2G     | 1.096 | 1.064 | 1.047 | 1.069 | 0.025 | 0.53 |
| TXK         | 1.139 | 1.069 | 0.995 | 1.068 | 0.072 | 0.53 |
| AKAP6       | 1.096 | 1.024 | 1.093 | 1.071 | 0.041 | 0.54 |
| MST4        | 1.098 | 1.130 | 0.976 | 1.068 | 0.081 | 0.54 |
| NJMU-R1     | 1.018 | 1.000 | 1.203 | 1.074 | 0.112 | 0.54 |
| DUSP22      | 1.069 | 1.188 | 0.949 | 1.069 | 0.120 | 0.55 |
| PMVK        | 1.135 | 1.126 | 0.945 | 1.069 | 0.107 | 0.55 |
| MET         | 1.070 | 1.064 | 1.089 | 1.074 | 0.013 | 0.56 |
| TTBK1       | 1.070 | 1.191 | 0.949 | 1.070 | 0.121 | 0.56 |
| G6PC        | 1.129 | 1.079 | 1.010 | 1.073 | 0.060 | 0.57 |
| PIK3AP1 (§) | 1.278 | 0.935 | 1.062 | 1.092 | 0.173 | 0.58 |
| KDR         | 1.035 | 1.110 | 1.085 | 1.077 | 0.038 | 0.59 |
| MAP3K5      | 0.981 | 1.202 | 1.047 | 1.077 | 0.113 | 0.59 |
| PCK2        | 1.142 | 1.103 | 0.979 | 1.075 | 0.085 | 0.59 |
| PTPN18      | 1.198 | 1.077 | 0.948 | 1.074 | 0.125 | 0.59 |
| UGP2        | 1.034 | 1.116 | 1.084 | 1.078 | 0.041 | 0.59 |
| DUSP11      | 1.070 | 1.030 | 1.141 | 1.080 | 0.056 | 0.60 |
| LATS1       | 1.056 | 1.041 | 1.142 | 1.080 | 0.055 | 0.60 |
| MAPKBP1     | 1.090 | 1.090 | 1.055 | 1.078 | 0.020 | 0.60 |
| TGFBR2      | 1.164 | 1.039 | 1.035 | 1.079 | 0.073 | 0.61 |
| CLK2        | 1.036 | 1.222 | 0.976 | 1.078 | 0.128 | 0.62 |
| ENPP3       | 1.061 | 1.039 | 1.149 | 1.083 | 0.058 | 0.62 |
| ANKK1       | 1.146 | 1.056 | 1.049 | 1.084 | 0.054 | 0.64 |
| LHPP        | 1.088 | 1.159 | 1.003 | 1.083 | 0.078 | 0.65 |
| PIB5PA      | 1.078 | 1.151 | 1.021 | 1.083 | 0.065 | 0.65 |
| MARK3       | 1.116 | 1.110 | 1.028 | 1.085 | 0.049 | 0.66 |
| CDC25A      | 1.173 | 1.078 | 1.008 | 1.086 | 0.083 | 0.67 |
| SNRK        | 1.128 | 1.036 | 1.099 | 1.088 | 0.047 | 0.67 |

|                |       |       |       |       |       |      |
|----------------|-------|-------|-------|-------|-------|------|
| LOC161635 (\$) | 1.167 | 1.323 | 0.938 | 1.143 | 0.194 | 0.67 |
| PDPR           | 1.019 | 1.142 | 1.107 | 1.089 | 0.063 | 0.68 |
| PTPLB          | 1.071 | 1.121 | 1.074 | 1.089 | 0.028 | 0.68 |
| PXK            | 0.978 | 1.073 | 1.229 | 1.093 | 0.127 | 0.69 |
| ALPL           | 1.098 | 1.059 | 1.121 | 1.093 | 0.031 | 0.70 |
| GAK            | 1.112 | 1.000 | 1.166 | 1.093 | 0.085 | 0.70 |
| LOC375449      | 1.143 | 1.070 | 1.059 | 1.091 | 0.046 | 0.70 |
| MAP4K1         | 1.195 | 1.076 | 0.997 | 1.089 | 0.100 | 0.70 |
| PHKG1          | 1.226 | 0.997 | 1.049 | 1.091 | 0.120 | 0.70 |
| PRKAR2A (\$)   | 1.014 | 1.256 | 1.125 | 1.132 | 0.121 | 0.70 |
| ERN2           | 1.080 | 1.193 | 1.003 | 1.092 | 0.096 | 0.72 |
| PPP5C          | 1.043 | 1.172 | 1.067 | 1.094 | 0.069 | 0.72 |
| PRSS7          | 1.204 | 0.964 | 1.117 | 1.095 | 0.122 | 0.72 |
| ADCK5          | 1.219 | 0.975 | 1.094 | 1.096 | 0.122 | 0.73 |
| FN3K           | 1.130 | 1.207 | 0.940 | 1.092 | 0.137 | 0.73 |
| ZAK            | 1.091 | 1.105 | 1.090 | 1.095 | 0.008 | 0.73 |
| PRKAR1B        | 1.392 | 1.000 | 0.883 | 1.092 | 0.267 | 0.74 |
| GCK            | 1.155 | 1.055 | 1.085 | 1.098 | 0.051 | 0.75 |
| MARK4          | 1.042 | 1.085 | 1.174 | 1.100 | 0.067 | 0.75 |
| PPM1A          | 1.159 | 0.950 | 1.195 | 1.101 | 0.132 | 0.76 |
| CDC25C         | 1.149 | 0.985 | 1.174 | 1.103 | 0.103 | 0.77 |
| MAP3K8         | 1.216 | 1.261 | 0.806 | 1.094 | 0.251 | 0.77 |
| DUSP16         | 1.094 | 1.140 | 1.068 | 1.101 | 0.036 | 0.78 |
| PTK2B          | 1.094 | 1.104 | 1.107 | 1.102 | 0.007 | 0.78 |
| NEK1           | 1.083 | 1.133 | 1.095 | 1.104 | 0.026 | 0.79 |
| PRKCB1 (\$)    | 1.041 | 1.154 | 1.250 | 1.148 | 0.105 | 0.79 |
| RPS6KB2        | 1.056 | 1.078 | 1.184 | 1.106 | 0.068 | 0.80 |
| SKP2           | 1.133 | 1.141 | 1.039 | 1.104 | 0.057 | 0.81 |
| STK22D         | 1.124 | 1.223 | 0.964 | 1.104 | 0.131 | 0.82 |
| PPP2R2D        | 0.991 | 1.263 | 1.069 | 1.108 | 0.140 | 0.83 |
| DCAMKL2 (\$)   | 1.222 | 1.194 | 1.062 | 1.159 | 0.085 | 0.83 |
| MAP3K10        | 1.071 | 1.204 | 1.056 | 1.110 | 0.081 | 0.85 |
| PPM1F          | 0.934 | 1.130 | 1.278 | 1.114 | 0.173 | 0.85 |
| RPS6KA3        | 1.027 | 0.948 | 1.377 | 1.117 | 0.228 | 0.85 |
| SGK1 (\$)      | 0.849 | 1.359 | 1.275 | 1.161 | 0.273 | 0.85 |
| DCK            | 1.082 | 1.134 | 1.122 | 1.113 | 0.027 | 0.86 |
| PGK2           | 1.064 | 1.127 | 1.148 | 1.113 | 0.044 | 0.86 |
| ERBB2          | 1.254 | 1.069 | 1.014 | 1.112 | 0.126 | 0.87 |
| NEK6           | 1.178 | 1.216 | 0.945 | 1.113 | 0.147 | 0.89 |
| LMTK3          | 0.923 | 0.950 | 1.506 | 1.126 | 0.329 | 0.90 |
| MAP2K2         | 1.192 | 1.156 | 0.997 | 1.115 | 0.104 | 0.90 |
| MAP2K4 (\$)    | 1.151 | 1.051 | 1.300 | 1.167 | 0.125 | 0.90 |

|            |       |       |       |       |       |      |
|------------|-------|-------|-------|-------|-------|------|
| TPTE2      | 1.124 | 1.089 | 1.146 | 1.120 | 0.029 | 0.91 |
| CDC2L1     | 1.124 | 1.105 | 1.134 | 1.121 | 0.015 | 0.92 |
| DUSP19     | 0.979 | 1.241 | 1.143 | 1.121 | 0.132 | 0.92 |
| PTPRA      | 1.222 | 1.064 | 1.077 | 1.121 | 0.088 | 0.93 |
| ADRBK1     | 1.255 | 1.059 | 1.052 | 1.122 | 0.115 | 0.94 |
| AURKB      | 1.270 | 0.994 | 1.102 | 1.122 | 0.139 | 0.94 |
| MAP3K7IP1  | 1.079 | 1.329 | 0.958 | 1.122 | 0.189 | 0.96 |
| BUB1       | 1.199 | 1.133 | 1.043 | 1.125 | 0.078 | 0.97 |
| CAMK2A     | 1.000 | 1.261 | 1.120 | 1.127 | 0.131 | 0.97 |
| DUSP12     | 1.251 | 1.077 | 1.046 | 1.125 | 0.111 | 0.97 |
| PPME1      | 1.226 | 1.077 | 1.079 | 1.127 | 0.085 | 0.98 |
| PCTK1      | 1.219 | 1.066 | 1.105 | 1.130 | 0.080 | 1.00 |
| SRPK1      | 1.086 | 1.365 | 0.930 | 1.127 | 0.220 | 1.00 |
| MAP4K2 (S) | 1.425 | 1.128 | 1.000 | 1.184 | 0.218 | 1.00 |
| WNK4       | 1.124 | 1.223 | 1.044 | 1.130 | 0.090 | 1.01 |
| AKAP7      | 1.180 | 1.281 | 0.926 | 1.129 | 0.183 | 1.02 |
| MAP4K4     | 1.201 | 1.094 | 1.102 | 1.132 | 0.060 | 1.02 |
| PDGFRA     | 1.134 | 1.023 | 1.254 | 1.137 | 0.116 | 1.03 |
| PKN3       | 1.213 | 1.244 | 0.932 | 1.130 | 0.172 | 1.03 |
| ALPPL2     | 1.145 | 1.088 | 1.177 | 1.137 | 0.045 | 1.04 |
| IRAK3      | 1.264 | 1.078 | 1.061 | 1.134 | 0.113 | 1.04 |
| KIAA1446   | 1.119 | 1.170 | 1.116 | 1.135 | 0.030 | 1.04 |
| PRKAG2     | 1.205 | 1.187 | 1.006 | 1.133 | 0.110 | 1.04 |
| ACP1       | 1.180 | 1.195 | 1.031 | 1.135 | 0.091 | 1.05 |
| PPFIA3     | 1.120 | 1.171 | 1.119 | 1.137 | 0.030 | 1.05 |
| AATK       | 1.219 | 1.162 | 1.029 | 1.137 | 0.098 | 1.06 |
| FLJ10986   | 0.945 | 0.997 | 1.497 | 1.146 | 0.305 | 1.06 |
| MYLK       | 1.102 | 1.046 | 1.278 | 1.142 | 0.121 | 1.06 |
| PPM2C      | 1.114 | 1.197 | 1.103 | 1.138 | 0.051 | 1.06 |
| CDK5R1     | 1.096 | 1.224 | 1.096 | 1.139 | 0.074 | 1.07 |
| GSK3A      | 1.070 | 1.171 | 1.188 | 1.143 | 0.064 | 1.09 |
| RFK        | 1.231 | 1.234 | 0.949 | 1.138 | 0.164 | 1.09 |
| FBP1       | 1.205 | 1.038 | 1.195 | 1.146 | 0.094 | 1.11 |
| ACP2       | 1.266 | 1.085 | 1.087 | 1.146 | 0.104 | 1.12 |
| DDR1       | 1.170 | 1.079 | 1.194 | 1.148 | 0.061 | 1.12 |
| DOLPP1     | 1.160 | 1.271 | 1.000 | 1.144 | 0.136 | 1.12 |
| GRK1       | 0.973 | 1.505 | 0.945 | 1.141 | 0.316 | 1.12 |
| LCK        | 1.198 | 0.939 | 1.314 | 1.150 | 0.192 | 1.12 |
| PI4KII     | 1.196 | 1.092 | 1.152 | 1.147 | 0.052 | 1.12 |
| ACP5       | 1.149 | 1.201 | 1.087 | 1.146 | 0.057 | 1.13 |
| MAPK8IP2   | 1.098 | 1.127 | 1.224 | 1.150 | 0.066 | 1.13 |
| PRKAB1     | 1.286 | 1.047 | 1.112 | 1.148 | 0.124 | 1.14 |

|               |       |       |       |       |       |      |
|---------------|-------|-------|-------|-------|-------|------|
| ACVR1B        | 1.263 | 1.065 | 1.120 | 1.149 | 0.102 | 1.15 |
| ATR           | 1.285 | 1.118 | 1.045 | 1.149 | 0.123 | 1.16 |
| IHPK1         | 1.172 | 1.070 | 1.219 | 1.154 | 0.076 | 1.16 |
| KSR2 (§)      | 1.194 | 1.065 | 1.375 | 1.211 | 0.156 | 1.16 |
| ULK4          | 1.199 | 1.251 | 1.000 | 1.150 | 0.132 | 1.17 |
| LOC390777 (§) | 1.139 | 1.194 | 1.344 | 1.226 | 0.106 | 1.17 |
| INPP5E        | 1.184 | 1.278 | 0.989 | 1.150 | 0.147 | 1.18 |
| MTMR9         | 1.118 | 1.053 | 1.303 | 1.158 | 0.130 | 1.18 |
| CDKN1A (§)    | 1.472 | 1.161 | 1.000 | 1.211 | 0.240 | 1.18 |
| CDKL5         | 1.238 | 1.236 | 0.980 | 1.151 | 0.148 | 1.19 |
| PRKD1 (§)     | 0.986 | 1.410 | 1.275 | 1.224 | 0.217 | 1.19 |
| PTPRK         | 1.198 | 1.104 | 1.180 | 1.161 | 0.050 | 1.22 |
| PANK3         | 1.084 | 1.213 | 1.196 | 1.164 | 0.070 | 1.25 |
| ACP6          | 1.036 | 1.231 | 1.232 | 1.166 | 0.113 | 1.26 |
| BLK           | 1.159 | 1.055 | 1.288 | 1.167 | 0.117 | 1.26 |
| CDK5R2        | 1.257 | 1.233 | 0.994 | 1.161 | 0.145 | 1.26 |
| MAP3K7IP2     | 1.116 | 1.270 | 1.106 | 1.164 | 0.092 | 1.26 |
| STK32C        | 1.135 | 1.176 | 1.186 | 1.166 | 0.027 | 1.26 |
| AKT2          | 1.074 | 1.152 | 1.281 | 1.169 | 0.105 | 1.27 |
| CDKL2         | 1.146 | 1.385 | 0.955 | 1.162 | 0.215 | 1.27 |
| DGKA (§)      | 1.028 | 1.226 | 1.500 | 1.251 | 0.237 | 1.27 |
| MAST2         | 1.006 | 1.329 | 1.168 | 1.168 | 0.162 | 1.28 |
| PKM2          | 1.013 | 1.254 | 1.238 | 1.168 | 0.135 | 1.28 |
| RIPK3         | 1.236 | 1.186 | 1.074 | 1.165 | 0.083 | 1.28 |
| CAMK2D        | 1.250 | 1.127 | 1.129 | 1.169 | 0.070 | 1.30 |
| PDP2          | 1.171 | 1.204 | 1.133 | 1.169 | 0.036 | 1.30 |
| PNCK          | 1.243 | 1.078 | 1.191 | 1.171 | 0.084 | 1.30 |
| RIPK2         | 1.034 | 1.110 | 1.381 | 1.175 | 0.182 | 1.30 |
| G6PC2         | 1.171 | 1.146 | 1.197 | 1.171 | 0.026 | 1.31 |
| PPFIA4        | 1.148 | 1.237 | 1.127 | 1.171 | 0.058 | 1.31 |
| CDC42BPG      | 1.041 | 1.107 | 1.386 | 1.178 | 0.183 | 1.33 |
| MAST3         | 1.413 | 1.251 | 0.837 | 1.167 | 0.297 | 1.33 |
| MVK           | 1.217 | 1.145 | 1.166 | 1.176 | 0.037 | 1.34 |
| FGR           | 1.179 | 1.238 | 1.107 | 1.175 | 0.066 | 1.35 |
| CTDP1         | 1.222 | 1.104 | 1.211 | 1.179 | 0.065 | 1.36 |
| PPP1R15A (§)  | 1.417 | 1.290 | 1.062 | 1.256 | 0.180 | 1.36 |
| PIP5K3        | 1.151 | 1.067 | 1.328 | 1.182 | 0.133 | 1.37 |
| PPP1R13B      | 1.210 | 1.224 | 1.098 | 1.177 | 0.069 | 1.37 |
| PIK3R1        | 1.097 | 1.160 | 1.294 | 1.184 | 0.101 | 1.38 |
| RPS6KB1       | 1.198 | 1.161 | 1.184 | 1.181 | 0.019 | 1.38 |
| PPP1R16B      | 1.148 | 1.136 | 1.285 | 1.190 | 0.083 | 1.43 |
| MAPK1 (§)     | 1.068 | 1.667 | 1.075 | 1.270 | 0.344 | 1.43 |

|          |       |       |       |       |       |      |
|----------|-------|-------|-------|-------|-------|------|
| LYN      | 1.121 | 1.260 | 1.183 | 1.188 | 0.070 | 1.44 |
| PFKFB1   | 1.129 | 1.298 | 1.133 | 1.187 | 0.096 | 1.44 |
| PAK2     | 1.064 | 1.289 | 1.219 | 1.191 | 0.115 | 1.45 |
| RAF1     | 1.150 | 1.214 | 1.210 | 1.191 | 0.036 | 1.46 |
| ITPA     | 1.220 | 1.096 | 1.267 | 1.194 | 0.088 | 1.47 |
| CDC2L6   | 1.134 | 1.088 | 1.373 | 1.198 | 0.153 | 1.49 |
| ENPP2    | 1.304 | 1.191 | 1.087 | 1.194 | 0.109 | 1.50 |
| SIRPD    | 1.196 | 1.278 | 1.109 | 1.194 | 0.085 | 1.50 |
| MAP2K6   | 1.186 | 1.536 | 0.857 | 1.193 | 0.340 | 1.53 |
| NME1     | 1.290 | 1.197 | 1.112 | 1.200 | 0.089 | 1.54 |
| PSPH     | 1.139 | 1.312 | 1.149 | 1.200 | 0.097 | 1.54 |
| PTP4A1   | 1.210 | 1.237 | 1.155 | 1.201 | 0.042 | 1.54 |
| PPP1R2P9 | 1.218 | 1.223 | 1.165 | 1.202 | 0.032 | 1.55 |
| DUSP7    | 1.047 | 1.191 | 1.392 | 1.210 | 0.173 | 1.57 |
| DTYMK    | 1.218 | 1.110 | 1.298 | 1.209 | 0.094 | 1.58 |
| TSKS     | 1.112 | 1.135 | 1.391 | 1.213 | 0.155 | 1.60 |
| CAMK2B   | 1.165 | 1.267 | 1.201 | 1.211 | 0.052 | 1.61 |
| RYK      | 1.145 | 1.417 | 1.065 | 1.209 | 0.185 | 1.62 |
| ALPK2    | 1.322 | 1.081 | 1.238 | 1.214 | 0.122 | 1.63 |
| FER      | 1.303 | 1.166 | 1.170 | 1.213 | 0.078 | 1.63 |
| MYLK2    | 1.142 | 1.182 | 1.323 | 1.216 | 0.095 | 1.63 |
| MAPKAP1  | 1.056 | 1.277 | 1.319 | 1.217 | 0.141 | 1.64 |
| MAP3K14  | 1.232 | 1.343 | 1.061 | 1.212 | 0.142 | 1.65 |
| CALM1    | 1.261 | 1.212 | 1.180 | 1.218 | 0.041 | 1.67 |
| PIK3R2   | 1.153 | 1.162 | 1.349 | 1.221 | 0.111 | 1.67 |
| NRK (§)  | 1.361 | 1.194 | 1.375 | 1.310 | 0.101 | 1.67 |
| FBP2     | 1.287 | 1.224 | 1.160 | 1.224 | 0.064 | 1.72 |
| SPHK1    | 1.162 | 1.448 | 1.058 | 1.223 | 0.202 | 1.73 |
| BTK      | 1.175 | 1.268 | 1.258 | 1.234 | 0.051 | 1.78 |
| PIK3CB   | 1.261 | 1.272 | 1.160 | 1.231 | 0.062 | 1.78 |
| IRAK2    | 1.317 | 1.131 | 1.270 | 1.239 | 0.097 | 1.82 |
| DAPK3    | 1.289 | 1.183 | 1.247 | 1.240 | 0.053 | 1.83 |
| KSR      | 1.164 | 1.403 | 1.146 | 1.238 | 0.143 | 1.83 |
| PIK3CD   | 1.123 | 1.235 | 1.371 | 1.243 | 0.124 | 1.83 |
| PKN2 (§) | 1.068 | 1.974 | 1.000 | 1.347 | 0.544 | 1.83 |
| LYK5     | 1.308 | 1.537 | 0.853 | 1.233 | 0.348 | 1.84 |
| INPP1    | 1.206 | 1.304 | 1.223 | 1.244 | 0.052 | 1.87 |
| PNKP     | 1.292 | 1.320 | 1.134 | 1.249 | 0.100 | 1.92 |
| PPEF1    | 1.301 | 1.201 | 1.251 | 1.251 | 0.050 | 1.92 |
| PRKCDBP  | 1.278 | 1.281 | 1.195 | 1.251 | 0.049 | 1.93 |
| UCKL1    | 1.256 | 1.270 | 1.253 | 1.260 | 0.009 | 1.98 |
| DUT      | 1.235 | 1.300 | 1.256 | 1.264 | 0.033 | 2.02 |

|          |       |       |       |       |       |       |
|----------|-------|-------|-------|-------|-------|-------|
| FGFR2    | 1.343 | 1.226 | 1.225 | 1.265 | 0.068 | 2.03  |
| CDKN1B   | 1.131 | 1.425 | 1.244 | 1.267 | 0.148 | 2.04  |
| ABL2     | 1.270 | 1.268 | 1.271 | 1.270 | 0.002 | 2.06  |
| CSNK1A1  | 1.248 | 1.294 | 1.265 | 1.269 | 0.023 | 2.06  |
| LATS2    | 1.457 | 1.459 | 0.907 | 1.274 | 0.318 | 2.16  |
| PTPMT1   | 1.263 | 1.203 | 1.389 | 1.285 | 0.095 | 2.16  |
| EPHA3    | 1.415 | 1.193 | 1.241 | 1.283 | 0.117 | 2.17  |
| PTK2     | 1.327 | 1.573 | 0.951 | 1.284 | 0.313 | 2.23  |
| STYXL1   | 1.270 | 1.320 | 1.299 | 1.296 | 0.025 | 2.26  |
| AK3      | 1.153 | 1.194 | 1.583 | 1.310 | 0.237 | 2.32  |
| SBK1     | 1.441 | 1.218 | 1.262 | 1.307 | 0.118 | 2.35  |
| FGFR4    | 1.325 | 1.384 | 1.210 | 1.306 | 0.088 | 2.36  |
| PTPRJ    | 1.389 | 1.291 | 1.242 | 1.307 | 0.075 | 2.36  |
| DUSP18   | 1.275 | 1.421 | 1.234 | 1.310 | 0.098 | 2.38  |
| ERBB3    | 1.538 | 1.232 | 1.173 | 1.314 | 0.196 | 2.43  |
| CDC2L5   | 1.220 | 1.606 | 1.146 | 1.324 | 0.247 | 2.51  |
| PFKFB3   | 1.503 | 1.266 | 1.213 | 1.327 | 0.154 | 2.52  |
| DUSP15   | 1.229 | 1.414 | 1.398 | 1.347 | 0.103 | 2.65  |
| FLT1     | 1.283 | 1.433 | 1.328 | 1.348 | 0.077 | 2.66  |
| MTM1     | 1.524 | 1.149 | 1.379 | 1.351 | 0.189 | 2.67  |
| CKS1B    | 1.307 | 1.458 | 1.292 | 1.352 | 0.092 | 2.70  |
| CKM (\$) | 1.139 | 2.419 | 1.250 | 1.603 | 0.709 | 2.71  |
| PKLR     | 1.374 | 1.172 | 1.573 | 1.373 | 0.201 | 2.82  |
| EPHB6    | 1.366 | 1.414 | 1.333 | 1.371 | 0.041 | 2.84  |
| CSNK1G3  | 1.489 | 1.303 | 1.324 | 1.372 | 0.102 | 2.85  |
| DUSP8    | 1.383 | 1.265 | 1.487 | 1.378 | 0.111 | 2.87  |
| ACPT     | 1.335 | 1.511 | 1.389 | 1.412 | 0.090 | 3.15  |
| BUB1B    | 1.392 | 1.273 | 1.590 | 1.418 | 0.160 | 3.17  |
| SRC      | 1.428 | 1.740 | 1.148 | 1.439 | 0.296 | 3.40  |
| FGFR3    | 1.746 | 1.490 | 1.156 | 1.464 | 0.296 | 3.60  |
| DUSP23   | 1.387 | 1.562 | 1.519 | 1.489 | 0.091 | 3.74  |
| DGKB     | 1.599 | 1.441 | 1.482 | 1.507 | 0.082 | 3.88  |
| DGKQ     | 1.550 | 1.591 | 1.838 | 1.660 | 0.156 | 5.01  |
| PPP1R15B | 1.429 | 1.822 | 1.722 | 1.658 | 0.204 | 5.02  |
| CDKN2A   | 1.403 | 1.479 | 2.187 | 1.690 | 0.432 | 5.19  |
| ERBB4    | 1.872 | 1.634 | 1.579 | 1.695 | 0.156 | 5.33  |
| BMPR1B   | 1.733 | 1.697 | 1.813 | 1.748 | 0.059 | 5.70  |
| CDK6     | 3.886 | 0.776 | 1.101 | 1.921 | 1.709 | 7.16  |
| EPHB2    | 2.170 | 2.488 | 2.295 | 2.318 | 0.160 | 10.08 |
| CDK5     | 4.381 | 1.206 | 1.374 | 2.320 | 1.787 | 10.24 |

**Supplementary table S2: Validated screening results of the secondary screen.** Normalized ratios of *firefly* (IRES) / *firefly* (cap) luciferase activities in Huh7.5 cells are shown. (Mean  $\pm$  sd from one experiment with three independent replicates on parallel plates). Screening hits (IRES < 100%; p<0.1, t-test) are highlighted in bold and green.

| Gene            | % IRES translation |      | % CAP translation |      | Ratio IRES/CAP | T-test       |
|-----------------|--------------------|------|-------------------|------|----------------|--------------|
|                 | m                  | sd   | m                 | sd   |                | p            |
| <b>ROR1</b>     | 85.8               | 21.7 | 172.5             | 29.8 | 0.50           | <b>0.015</b> |
| PCTK3           | 52.1               | 16.4 | 98.8              | 46.7 | 0.53           | 0.177        |
| <b>NTRK1</b>    | 55.0               | 5.0  | 97.7              | 17.8 | 0.56           | <b>0.016</b> |
| <b>EPHA5</b>    | 53.2               | 8.6  | 83.2              | 4.0  | 0.64           | <b>0.005</b> |
| PDK4            | 133.6              | 27.6 | 208.7             | 39.4 | 0.64           | 0.054        |
| <b>MKNK1</b>    | 86.3               | 11.6 | 126.3             | 16.2 | 0.68           | <b>0.025</b> |
| MTMR12          | 66.5               | 6.0  | 91.0              | 22.2 | 0.73           | 0.139        |
| STK25           | 104.2              | 41.7 | 141.4             | 14.4 | 0.74           | 0.217        |
| <b>PIK4CB</b>   | 81.5               | 13.7 | 110.0             | 11.8 | 0.74           | <b>0.052</b> |
| <b>NYD-SP25</b> | 82.7               | 20.8 | 111.5             | 5.6  | 0.74           | <b>0.083</b> |
| <b>PTPN2</b>    | 75.0               | 8.0  | 100.9             | 16.5 | 0.74           | <b>0.071</b> |
| CDK4            | 79.1               | 8.5  | 100.6             | 18.4 | 0.79           | 0.141        |
| <b>ULK1</b>     | 44.0               | 3.8  | 52.3              | 5.1  | 0.84           | <b>0.087</b> |
| MGC75495        | 51.5               | 17.8 | 61.2              | 7.8  | 0.84           | 0.438        |
| GK2             | 109.6              | 20.0 | 129.4             | 57.5 | 0.85           | 0.603        |
| CDC42BPA        | 84.2               | 8.7  | 98.6              | 11.4 | 0.85           | 0.157        |
| GRK4            | 126.8              | 25.6 | 146.8             | 27.0 | 0.86           | 0.406        |
| PFKM            | 76.2               | 6.7  | 86.6              | 21.5 | 0.88           | 0.467        |
| PTPN12          | 65.7               | 21.9 | 73.5              | 24.9 | 0.89           | 0.705        |
| KHK             | 50.6               | 7.8  | 56.2              | 12.5 | 0.90           | 0.539        |
| ALPI            | 82.4               | 13.2 | 90.0              | 25.3 | 0.92           | 0.666        |
| ADK             | 50.7               | 8.8  | 55.2              | 2.2  | 0.92           | 0.438        |
| GALK2           | 120.2              | 12.5 | 127.4             | 44.8 | 0.94           | 0.803        |
| CIB3            | 64.0               | 19.7 | 66.9              | 17.8 | 0.96           | 0.857        |
| DGKZ            | 97.4               | 17.1 | 101.7             | 28.0 | 0.96           | 0.835        |
| PTPLA           | 200.3              | 36.9 | 208.5             | 70.1 | 0.96           | 0.866        |
| MST1R           | 99.7               | 5.8  | 103.3             | 46.5 | 0.97           | 0.901        |
| MAP3K4          | 127.7              | 3.6  | 129.4             | 62.6 | 0.99           | 0.966        |
| PTPRN           | 130.8              | 20.4 | 128.5             | 67.0 | 1.02           | 0.956        |
| MAP3K12         | 91.7               | 38.2 | 89.3              | 11.5 | 1.03           | 0.919        |
| PIM1            | 125.2              | 10.3 | 121.5             | 24.6 | 1.03           | 0.825        |
| CDKN2B          | 181.1              | 23.1 | 167.7             | 35.8 | 1.08           | 0.613        |

|          |       |      |       |      |      |       |
|----------|-------|------|-------|------|------|-------|
| LTK      | 204.4 | 31.2 | 188.0 | 90.3 | 1.09 | 0.781 |
| ITPKA    | 110.2 | 21.3 | 97.7  | 7.1  | 1.13 | 0.385 |
| TYROBP   | 113.1 | 20.1 | 97.1  | 22.6 | 1.16 | 0.411 |
| PRKAA2   | 133.3 | 10.2 | 113.8 | 31.4 | 1.17 | 0.364 |
| PFKFB4   | 149.7 | 15.6 | 126.8 | 38.5 | 1.18 | 0.393 |
| PPP1R12C | 132.2 | 30.0 | 107.7 | 48.5 | 1.23 | 0.499 |
| MINPP1   | 201.4 | 20.8 | 163.1 | 67.9 | 1.23 | 0.403 |
| CSK      | 158.7 | 23.7 | 127.5 | 16.0 | 1.25 | 0.131 |
| CDK7     | 172.8 | 26.8 | 135.6 | 37.4 | 1.27 | 0.234 |
| CDK8     | 151.3 | 32.4 | 114.4 | 22.4 | 1.32 | 0.180 |
| CSNK2B   | 126.8 | 17.6 | 95.4  | 27.6 | 1.33 | 0.173 |
| CKMT2    | 101.6 | 18.4 | 72.6  | 23.5 | 1.40 | 0.168 |
| PTPRS    | 0.4   | 0.1  | 0.2   | 0.0  | 2.00 | 0.007 |
| EPHB2    | 206.5 | 27.7 | 86.6  | 11.4 | 2.38 | 0.002 |

**Supplementary table S3: Impact of gene silencing of screening hits on HCV infection.** Impact of gene silencing (four individual siRNAs per target) on HCVcc infection (strain Luc-Jc1) of Huh7.5.1 cells. Data are expressed as mean relative light units +/- sd (one experiment with three independent replicates on parallel plates). Risk-free siRNA (CTRL), siRNAs targeting CD81 or luciferase served as controls and are highlighted in bold. ULK1 was screened in an independent experiment and provided separately together with the corresponding controls.

| Experiment 1<br>Gene | Luciferase activity |        |         |        |         |        |         |        |
|----------------------|---------------------|--------|---------|--------|---------|--------|---------|--------|
|                      | m_si1               | sd_si1 | m_si2   | sd_si2 | m_si3   | sd_si3 | m_si4   | sd_si4 |
| <b>CTRL</b>          | 712957              | 81338  |         |        |         |        |         |        |
| <b>CD81</b>          | 157138              | 37465  |         |        |         |        |         |        |
| <b>Luciferase</b>    | 149347              | 43331  |         |        |         |        |         |        |
| CDK4                 | 346713              | 133756 | 1347077 | 353268 | 925320  | 247770 | 365680  | 101871 |
| EphA5                | 567350              | 21988  | 81030   | 58168  | 554297  | 63572  | 53183   | 18384  |
| MKNK1                | 944740              | 151081 | 582957  | 113181 | 393997  | 81617  | 363567  | 100588 |
| MTMR12               | 134013              | 34771  | 609040  | 115988 | 184533  | 19418  | 378613  | 25276  |
| NEK7                 | 575500              | 63490  | 894437  | 197798 | 251450  | 112059 | 1049873 | 89200  |
| NTRK1                | 834343              | 134365 | 537073  | 47967  | 955840  | 14587  | 478640  | 56582  |
| NYD-SP25             | 562000              | 261001 | 411207  | 88323  | 611927  | 229800 | 296070  | 113363 |
| PIK4CB               | 789647              | 92954  | 384170  | 37430  | 394263  | 108481 | 374160  | 101302 |
| PTPN2                | 1041720             | 29609  | 573240  | 65793  | 452960  | 85441  | 554610  | 23087  |
| ROR1                 | 824177              | 175535 | 768230  | 74890  | 1006970 | 200717 | 699680  | 83473  |



|                     |                     |        |         |        |        |        |        |        |
|---------------------|---------------------|--------|---------|--------|--------|--------|--------|--------|
| CDK4                | 346713              | 133756 | 1347077 | 353268 | 925320 | 247770 | 365680 | 101871 |
| <i>Experiment 2</i> | Luciferase activity |        |         |        |        |        |        |        |
| Gene                | m_si1               | sd_si1 | m_si2   | sd_si2 | m_si3  | sd_si3 | m_si4  | sd_si4 |
| <b>CTRL</b>         | 114143              | 65491  |         |        |        |        |        |        |
| <b>CD81</b>         | 1617                | 1432   |         |        |        |        |        |        |
| ULK1                | 107120              | 42004  | 83337   | 8206   | 16597  | 3132   | 5480   | 3396   |

**Supplementary table S4: Impact of gene silencing of screening hits on cell viability.**

Huh7.5.1 cells were silenced with siRNA (four individual siRNAs per target) and cell viability was assessed using MTT (Experiment 1) and Presto Blue (Experiment 2) assay. Data are expressed as mean light absorption +/- sd (one experiment with three independent replicates on parallel plates). Risk-free siRNA (CTRL), siRNA targeting CD81 and luciferase served as controls and are highlighted in bold. ULK1 was screening in an independent experiment and provided separately together with the corresponding controls.

|                     |                |        |       |        |       |        |       |        |
|---------------------|----------------|--------|-------|--------|-------|--------|-------|--------|
| <i>Experiment 1</i> | Cell viability |        |       |        |       |        |       |        |
| Gene                | m_si1          | sd_si1 | m_si2 | sd_si2 | m_si3 | sd_si3 | m_si4 | sd_si4 |
| <b>CTRL</b>         | 0.155          | 0.031  |       |        |       |        |       |        |
| <b>CD81</b>         | 0.144          | 0.025  |       |        |       |        |       |        |
| <b>Luciferase</b>   | 0.155          | 0.025  |       |        |       |        |       |        |
| CDK4                | 0.129          | 0.018  | 0.141 | 0.029  | 0.170 | 0.039  | 0.131 | 0.022  |
| EphA5               | 0.108          | 0.025  | 0.100 | 0.017  | 0.096 | 0.010  | 0.079 | 0.006  |
| MKNK1               | 0.139          | 0.037  | 0.128 | 0.021  | 0.126 | 0.013  | 0.122 | 0.015  |
| MTMR12              | 0.104          | 0.021  | 0.131 | 0.037  | 0.112 | 0.009  | 0.098 | 0.009  |
| NEK7                | 0.147          | 0.032  | 0.126 | 0.025  | 0.130 | 0.020  | 0.182 | 0.047  |
| NTRK1               | 0.155          | 0.061  | 0.142 | 0.015  | 0.129 | 0.026  | 0.155 | 0.028  |
| NYD-SP25            | 0.151          | 0.049  | 0.146 | 0.022  | 0.169 | 0.018  | 0.119 | 0.019  |
| PIK4CB              | 0.121          | 0.019  | 0.119 | 0.020  | 0.136 | 0.022  | 0.147 | 0.020  |
| PTPN2               | 0.131          | 0.026  | 0.150 | 0.019  | 0.128 | 0.017  | 0.116 | 0.022  |
| ROR1                | 0.134          | 0.015  | 0.144 | 0.010  | 0.134 | 0.026  | 0.180 | 0.033  |
| CDK4                | 0.129          | 0.018  | 0.141 | 0.029  | 0.170 | 0.039  | 0.131 | 0.022  |
| <i>Experiment 2</i> | Cell viability |        |       |        |       |        |       |        |
| Gene                | m_si1          | sd_si1 | m_si2 | sd_si2 | m_si3 | sd_si3 | m_si4 | sd_si4 |
| <b>CTRL</b>         | 0.214          | 0.010  |       |        |       |        |       |        |
| <b>CD81</b>         | 0.190          | 0.011  |       |        |       |        |       |        |
| ULK1                | 0.207          | 0.018  | 0.205 | 0.012  | 0.188 | 0.007  | 0.166 | 0.013  |

**Supplementary table S5: Validated screening results of the tertiary screen.** Analysis of the raw data in supplementary tables S3-4. Impact of gene silencing (four individual siRNAs per target) on HCVcc (strain Luc-Jc1) infection of Huh7.5.1 cells in fold change (fc) and SSMDs (one experiment with three independent replicates on parallel plates). Toxic siRNAs are highlighted in red and are defined by a decrease of cell viability >2x plate median of all standard deviations. Screening hits are scored by products of SSMD values from individual siRNAs and highlighted in green if SSMD<=-1.645 (“fairly strong” inhibition).

| Gene            | fc_si1 | fc_si2 | fc_si3 | fc_si4 | SSMD_si1 | SSMD_si2 | SSMD_si3 | SSMD_si4 | Score        |
|-----------------|--------|--------|--------|--------|----------|----------|----------|----------|--------------|
| <b>PIK4CB</b>   | 1.11   | -1.86  | -1.81  | -1.91  | 2.176    | -3.675   | -1.807   | -4.706   | <b>10.19</b> |
| <b>MKNK1</b>    | 1.33   | -1.22  | -1.81  | -1.96  | 0.930    | -0.334   | -2.358   | -6.657   | <b>-9.01</b> |
| <b>NYD-SP25</b> | -2.00  | -1.35  | -2.78  | -1.47  | -2.878   | -0.541   | -5.657   | -0.496   | <b>-8.53</b> |
| PTPN2           | 1.46   | -1.24  | -1.57  | -1.29  | 1.944    | -1.461   | -41.805  | -1.037   |              |
| EphA5           | 1.06   | -6.58  | 1.04   | 10.03  | 0.272    | -3.969   | 0.150    | -3.151   |              |
| NTRK1           | 1.01   | -1.53  | 1.16   | -1.72  | 0.210    | -4.259   | 1.113    | -1.338   |              |
| ULK1 (§)        | -1.07  | -1.37  | -6.88  | 20.83  | -0.071   | -0.369   | -1.176   | -1.310   |              |
| ROR1            | 1.00   | -1.07  | 1.22   | -1.18  | 0.054    | -0.170   | 0.518    | -0.504   |              |

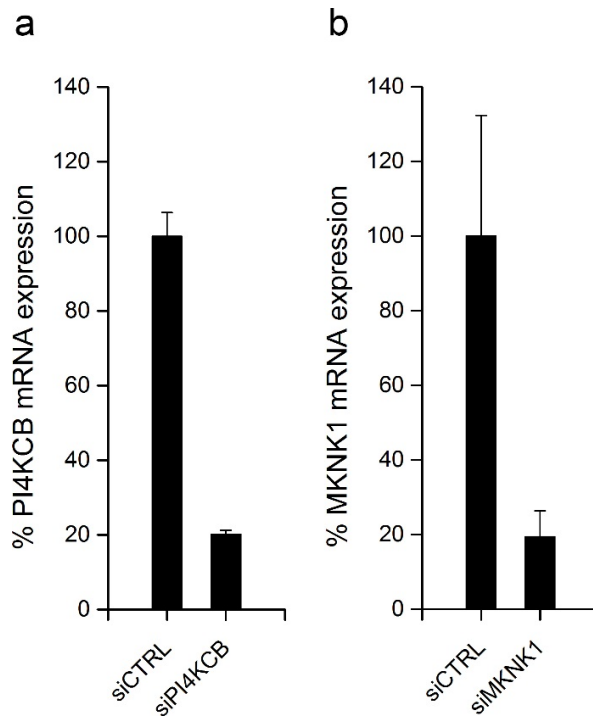

**Supplementary figure S1: Specific mRNA knockdown by candidate siRNAs.** Quantitative RT-PCR 2 days after gene silencing of PI4KCB (a) and MKNK1 (b) with specific siRNA (pool of four siRNAs per target). Data are expressed in percent target mRNA expression normalized to GAPDH +/- SEM (one experiment with three independent replicates on parallel plates, measured in duplicates by qPCR).
